# Supplementary material for: m-Terphenylamines, Acting as Selective COX-1 Inhibitors, Block Microglia Inflammatory Response and Exert Neuroprotective Activity
Source: MDPI journal article supplement (doi:10.3390/molecules28145374), 2023-07-13

## *Supporting Information*

### **m-Terphenylamines, acting as selective COX-1 inhibitors, block microglia inflammatory response and exert neuroprotective activity**

**Damiano Rocchi <sup>1</sup>, Juan F. González <sup>1</sup>, Olmo Martín-Cámara <sup>1</sup>, Maria Grazia Perrone <sup>2</sup>,  
Morena Miciaccia <sup>2</sup>,  
Antonio Scilimati <sup>2</sup>, Celine Decouty-Pérez <sup>3</sup>, Esther Parada <sup>3</sup>, Javier Egea <sup>3,\*</sup> and J. Carlos  
Menéndez <sup>1,\*</sup>**

<sup>1</sup> Unidad de Química Orgánica y Farmacéutica, Departamento de Química en Ciencias Farmacéuticas, Facultad de Farmacia, Universidad Complutense, 28040 Madrid, Spain; rocchid83@gmail.com (D.R.); jfgonzal@ucm.es (J.F.G.); olmomart@ucm.es (O.M.-C.)

<sup>2</sup> Dipartimento di Farmacia—Scienze del Farmaco, Università degli Studi di Bari Aldo Moro, 70121 Bari, Italy; mariagrazia.perrone@uniba.it (M.G.P.); morena.miciaccia@uniba.it (M.M.); antonio.scilimati@uniba.it (A.S.)

<sup>3</sup> Molecular Neuroinflammation and Neuronal Plasticity Research Laboratory, Hospital Universitario Santa Cristina, Instituto de Investigación Sanitaria-Hospital Universitario de la Princesa, 28009 Madrid, Spain; celinedecouty96@gmail.com (C.D.-P.); esther.parada@educa.madrid.org (E.P.)

\* Correspondence: javier.egea@inv.uam.es (J.E.); josecm@ucm.es (J.C.M.)

#### **Content:**

Prediction of physicochemical and ADMET properties of compounds **3** S2

Copies of NMR spectra S4



### Prediction of ADME properties of compounds 3

**Table S1.** Swiss-ADME characterization of drug-like properties of compounds 3

| Smiles code                                                      | Cmpd Number | Rotable bonds | TPSA <sup>1</sup> | Log P o/w <sup>2</sup> | Log S <sup>3</sup> | Predicted GI Absorption <sup>4</sup> | Lipinski violations <sup>5</sup> | PAINS alerts <sup>6</sup> |
|------------------------------------------------------------------|-------------|---------------|-------------------|------------------------|--------------------|--------------------------------------|----------------------------------|---------------------------|
| <chem>NC1=CC(C2=CC=CC=C2)=CC(C3=CC=CC=C3)=C1</chem>              | <b>3a</b>   | 2             | 26.02             | 4.08                   | -4.76 (M)          | High                                 | 1                                | 0                         |
| <chem>NC1=CC(C2=CC=C(C)C=C2)=CC(C3=CC=CC=C3)=C1</chem>           | <b>3b</b>   | 2             | 26.02             | 4.42                   | -5.04 (M)          | High                                 | 1                                | 0                         |
| <chem>NC1=CC(C2=CC=C(Cl)C=C2)=CC(C3=CC=CC=C3)=C1</chem>          | <b>3c</b>   | 2             | 26.02             | 4.71                   | -5.62 (M)          | High                                 | 1                                | 0                         |
| <chem>NC1=CC(C2=CC=C(Cl)C=C2)=CC(C3=CC=C(Cl)C=C3)=C1</chem>      | <b>3d</b>   | 2             | 26.02             | 5.15                   | -5.91 (P)          | High                                 | 1                                | 0                         |
| <chem>NC1=CC(C2=CC=C(OC)C=C2)=CC(C3=CC=CC=C3)=C1</chem>          | <b>3e</b>   | 3             | 35.25             | 4.06                   | -4.79 (M)          | High                                 | 0                                | 0                         |
| <chem>NC1=CC(C2=CC=C(Br)C=C2)=CC(C3=CC=C(Br)C=C3)=C1</chem>      | <b>3f</b>   | 2             | 26.02             | 5.32                   | -6.55 (P)          | High                                 | 1                                | 0                         |
| <chem>C1(C2=CC=CC=C2)=CC(C3=CC=CC=C3)=CC(NC4=CC=CC=C4)=C1</chem> | <b>3g</b>   | 4             | 12.03             | 5.73                   | -6.51 (P)          | Low                                  | 1                                | 0                         |

1. Topological Polar Surface Area calculated from: Ertl, P.; Rohde, B.; Selzer, P. Fast calculation of molecular polar surface area as a sum of fragment-based contributions and its application to the prediction of drug transport properties. *J. Med. Chem.* **2000**, *43*, 3714–3717. 2.

2. Consensus Log P o/w average of 5 prediction methods.

3. ESOL topological method implemented from Delaney, J. S. Prediction of aqueous solubility and partition coefficient optimized by a genetic algorithm-based descriptor selection method. *J. Chem. Inf. Model.* **2004**, *44*, 1000-1005. M, moderately soluble. P, poorly soluble.

4. Saina, A.; Zoete, V. A BOILED-Egg to predict gastrointestinal absorption and brain penetration of small molecules. *Chem. Med. Chem.* **2016**, *11*, 1117-1121.

5. Lipinski, C. A.; Lombardo, F.; Dominy, B. W.; Feeney, P. J. Experimental and computational approaches to estimate solubility and permeability in drug discovery and development settings. *Adv. Drug Deliv. Rev.* **2001**, *46*, 3-26. Compounds with no or only one violation are considered to comply with Lipinski's rule.

6. Baell, J.B.; Holloway G. A. New substructure filters for removal of pan assay interference compounds (PAINS) from screening libraries and for their exclusion in bioassays. *J. Med. Chem.* **2010**, *53*, 2719-2740.



**Table S2. Admet-SAR prediction of ADME properties of compounds 3**

|           | Physicochemical-<br>drug-likeness <sup>1</sup> | Absorption                     |                        | Distribution                             |                             |                              | Metabolism                                 |
|-----------|------------------------------------------------|--------------------------------|------------------------|------------------------------------------|-----------------------------|------------------------------|--------------------------------------------|
|           |                                                | Human intestinal<br>absorption | Caco-2<br>Permeability | Blood-Brain Barrier<br>(BBB) penetration | P-glycoprotein<br>substrate | P-glycoprotein<br>inhibition | CYP inhibitory<br>promiscuity <sup>2</sup> |
| <b>3a</b> | +                                              | + (0.99)                       | + (0.87)               | + (0.97)                                 | - (0.97)                    | - (0.89)                     | + (0.76)                                   |
| <b>3b</b> | +                                              | + (0.99)                       | + (0.88)               | + (0.97)                                 | - (0.96)                    | - (0.73)                     | + (0.70)                                   |
| <b>3c</b> | +                                              | + (0.99)                       | + (0.83)               | + (0.97)                                 | - (0.98)                    | - (0.85)                     | + (0.76)                                   |
| <b>3d</b> | +                                              | + (0.99)                       | + (0.82)               | + (0.97)                                 | - (0.98)                    | - (0.83)                     | + (0.76)                                   |
| <b>3e</b> | +                                              | + (0.99)                       | + (0.91)               | + (0.70)                                 | - (0.94)                    | - (0.64)                     | + (0.76)                                   |
| <b>3f</b> | +                                              | + (0.99)                       | + (0.82)               | + (0.97)                                 | - (0.98)                    | - (0.81)                     | + (0.79)                                   |
| <b>3g</b> | +                                              | + (0.99)                       | + (0.87)               | + (0.95)                                 | - (0.98)                    | - (0.79)                     | + (0.85)                                   |

1 Molecular weight, alogP, number of atoms, number of rings, H-bond acceptors, and H-bond donors was used to calculate this factor.

2 CYP inhibitory promiscuity refers to the capacity for compounds to bind to different CYP enzymes (substrate of CYP2C9, 2D6, 3A4 and inhibitor of CYP1A2, 2D6, 2C9, 2C19, 3A4).



## Copies of NMR spectra

### 6-Amino-2,4-diphenylbenzoic acid (2a)

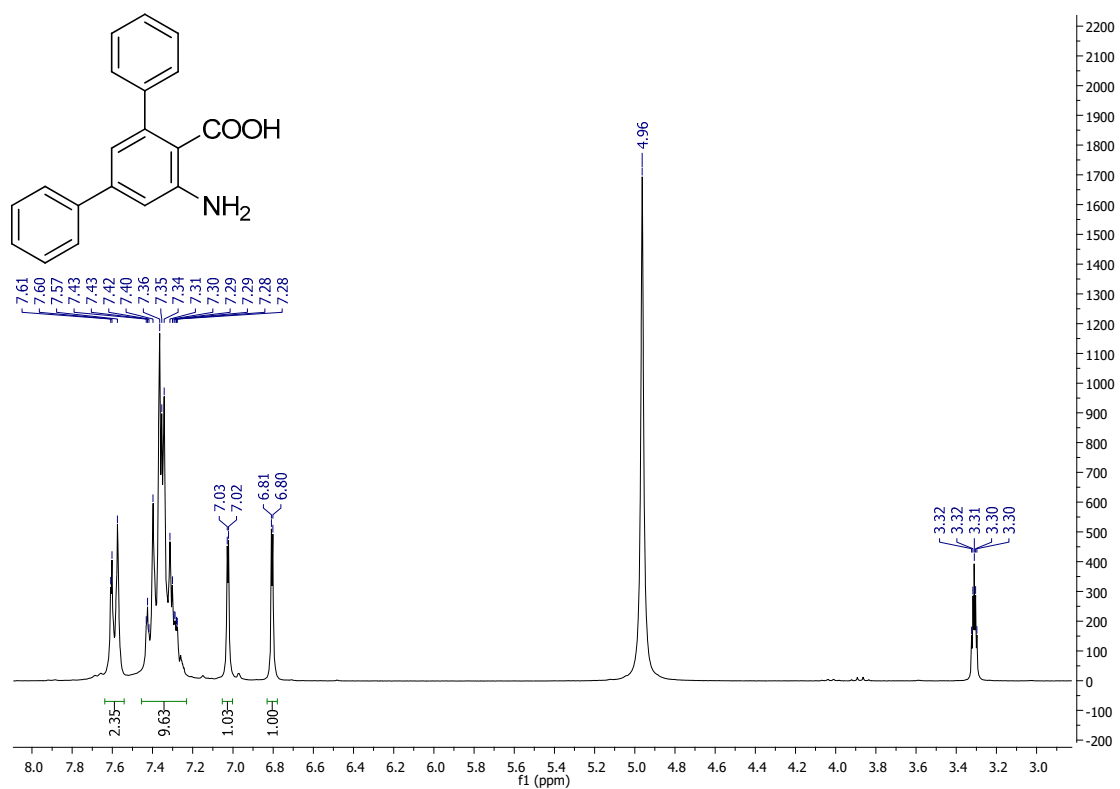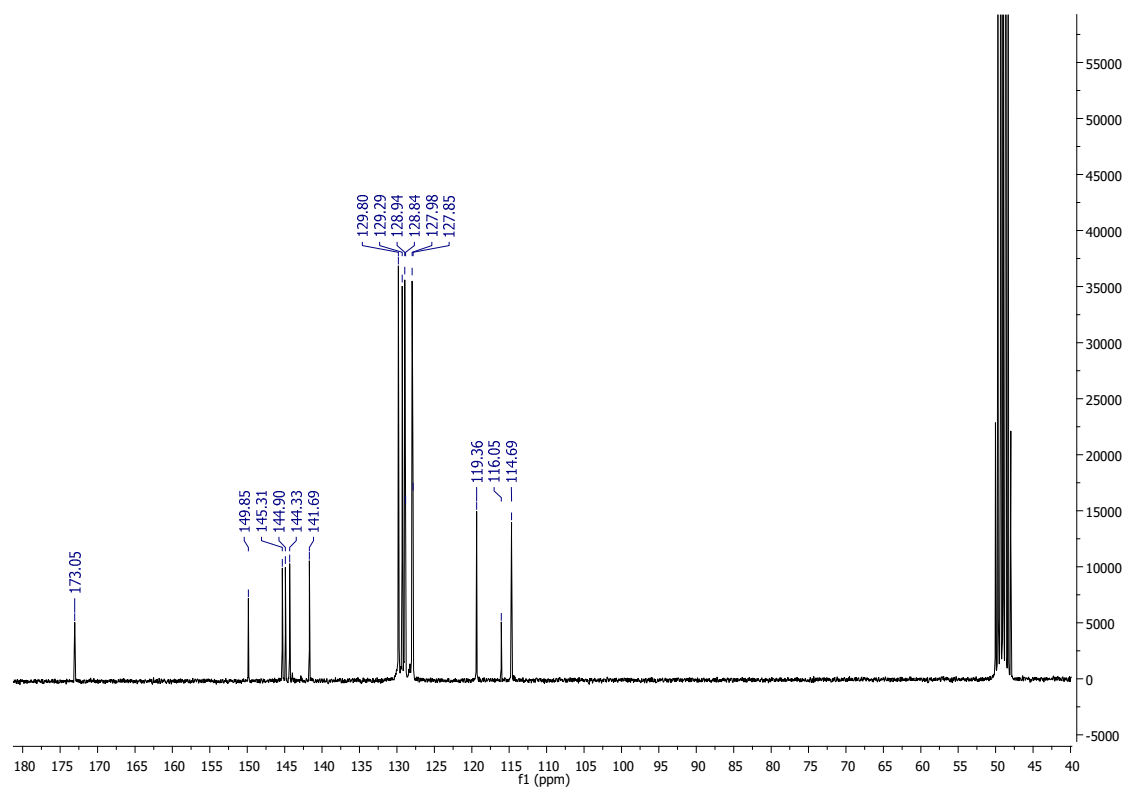



## 6-Amino-2-phenyl-4-(4-tolyl)benzoic acid (2b)

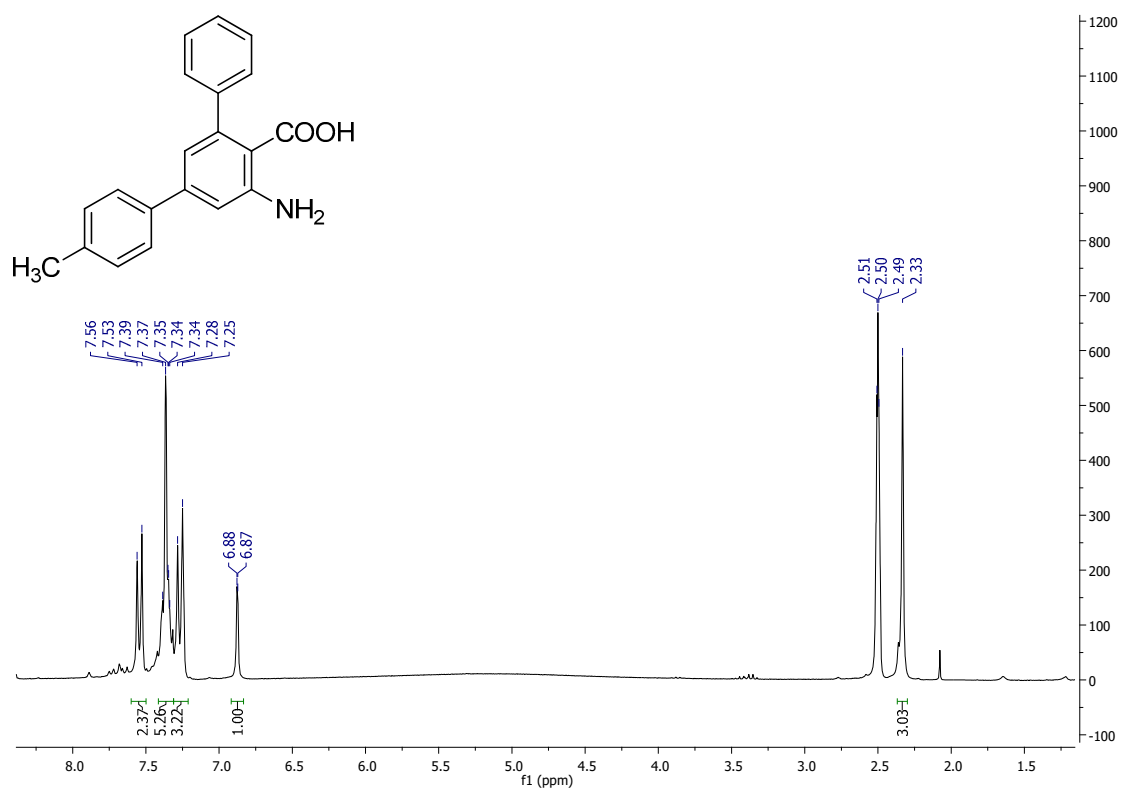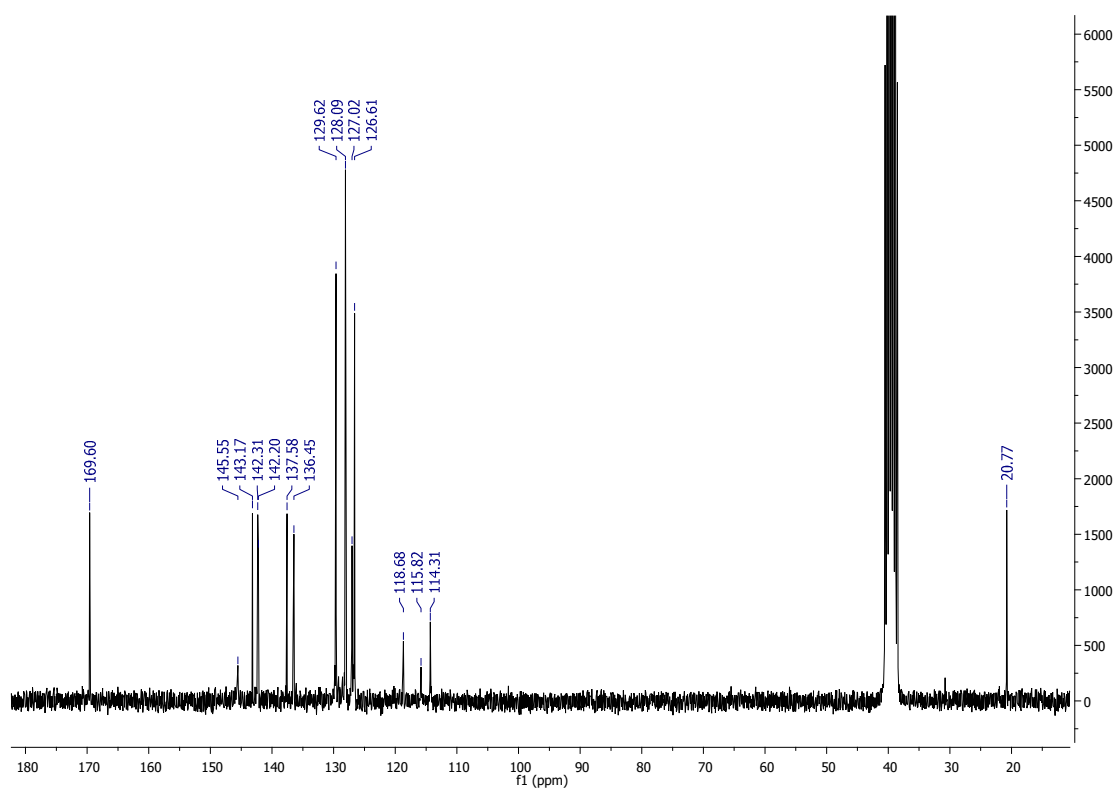



# **6-Amino-2-phenyl-4-(4-chlorophenyl)benzoic acid (2c)**

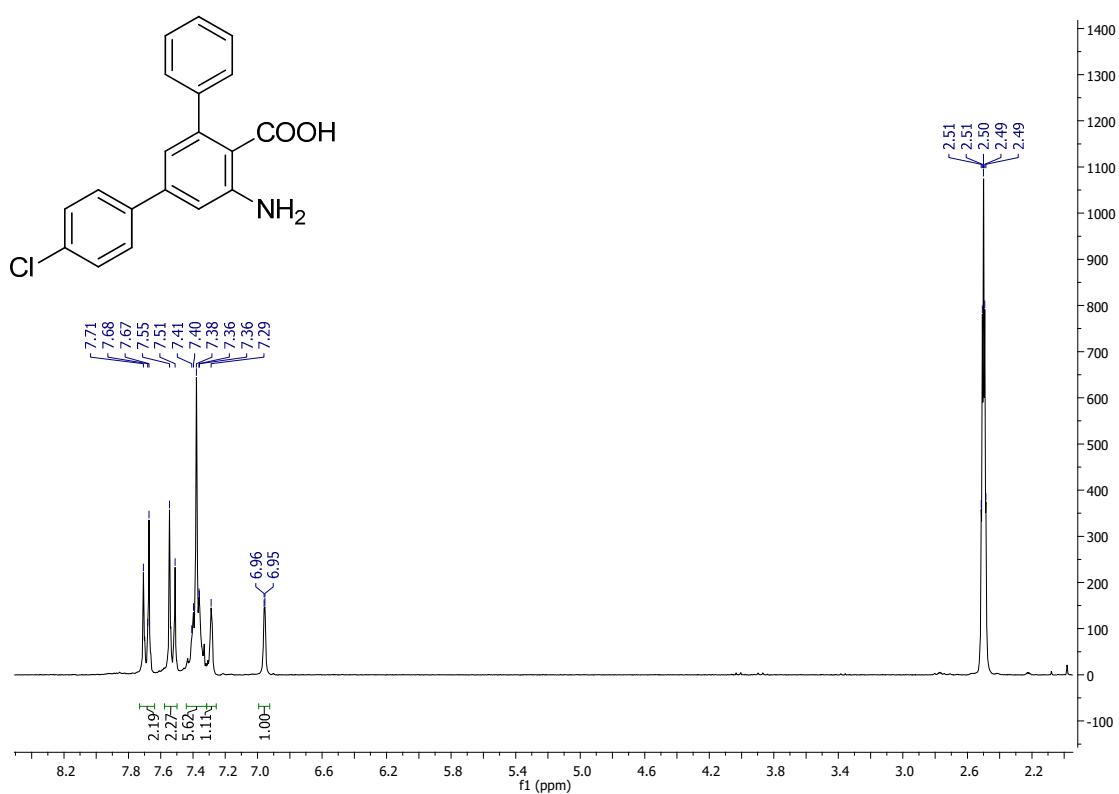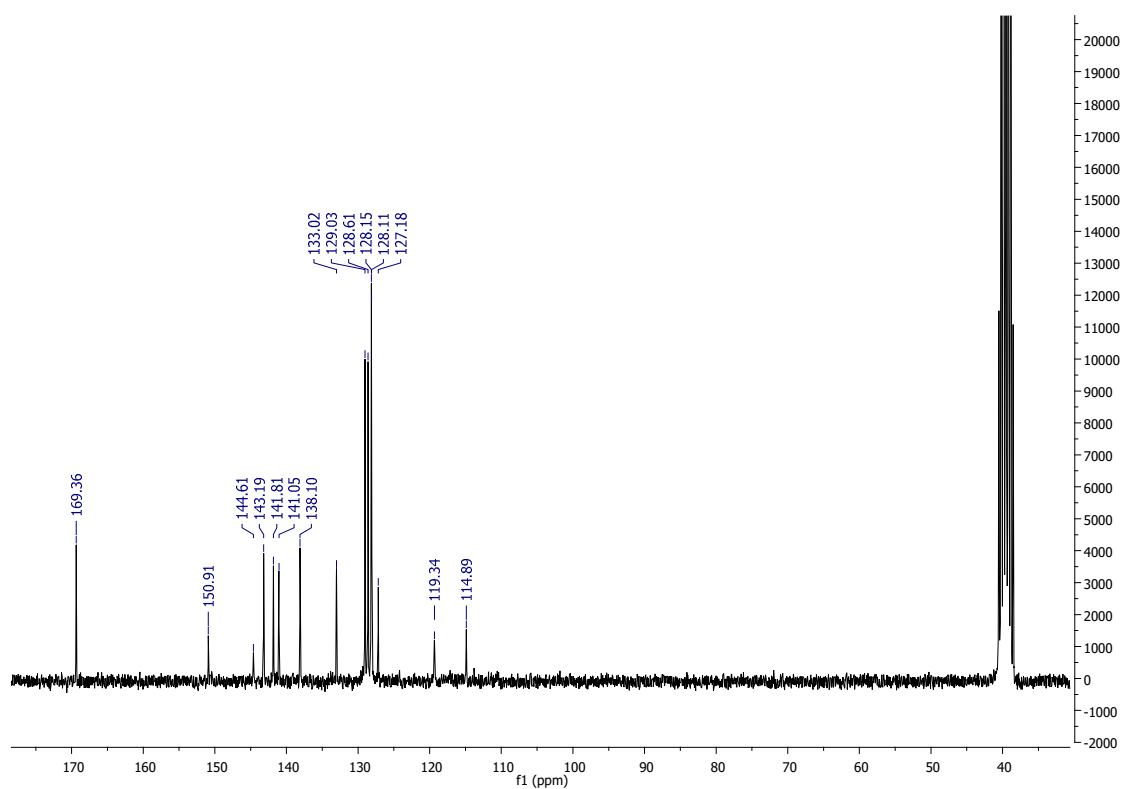



**6-Amino-2,4-di-(4-chlorophenyl)benzoic acid (2d).**

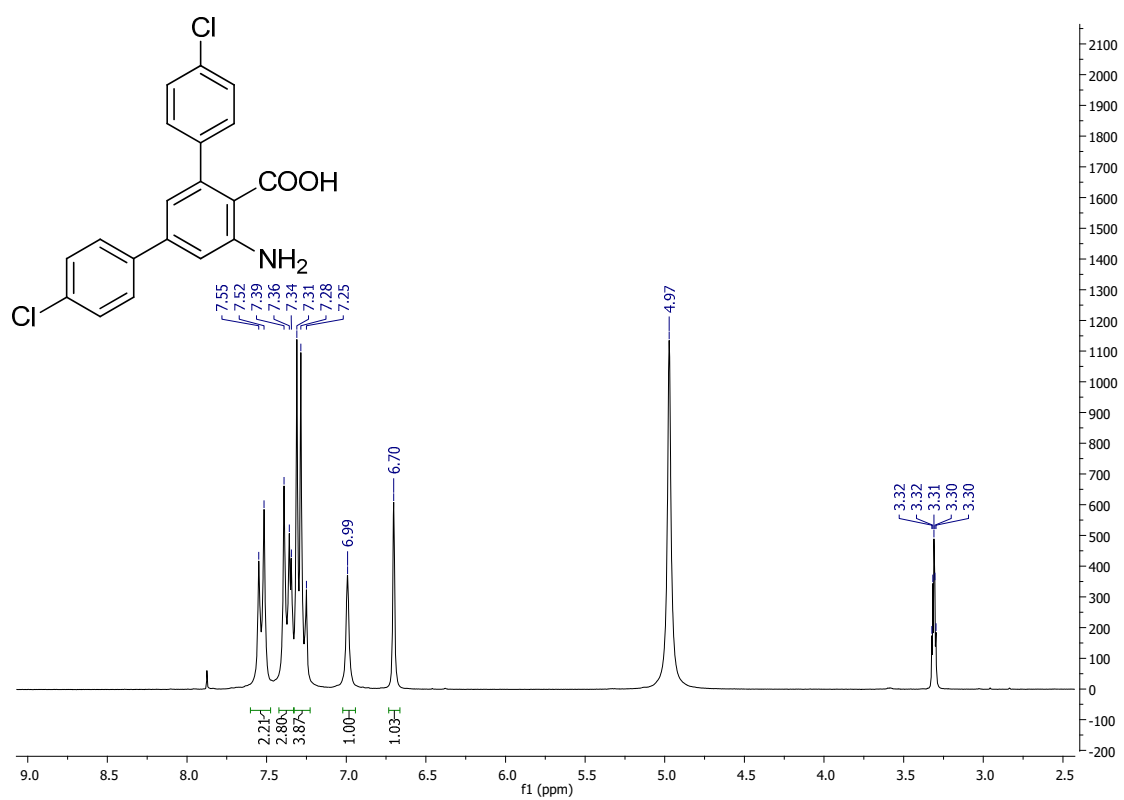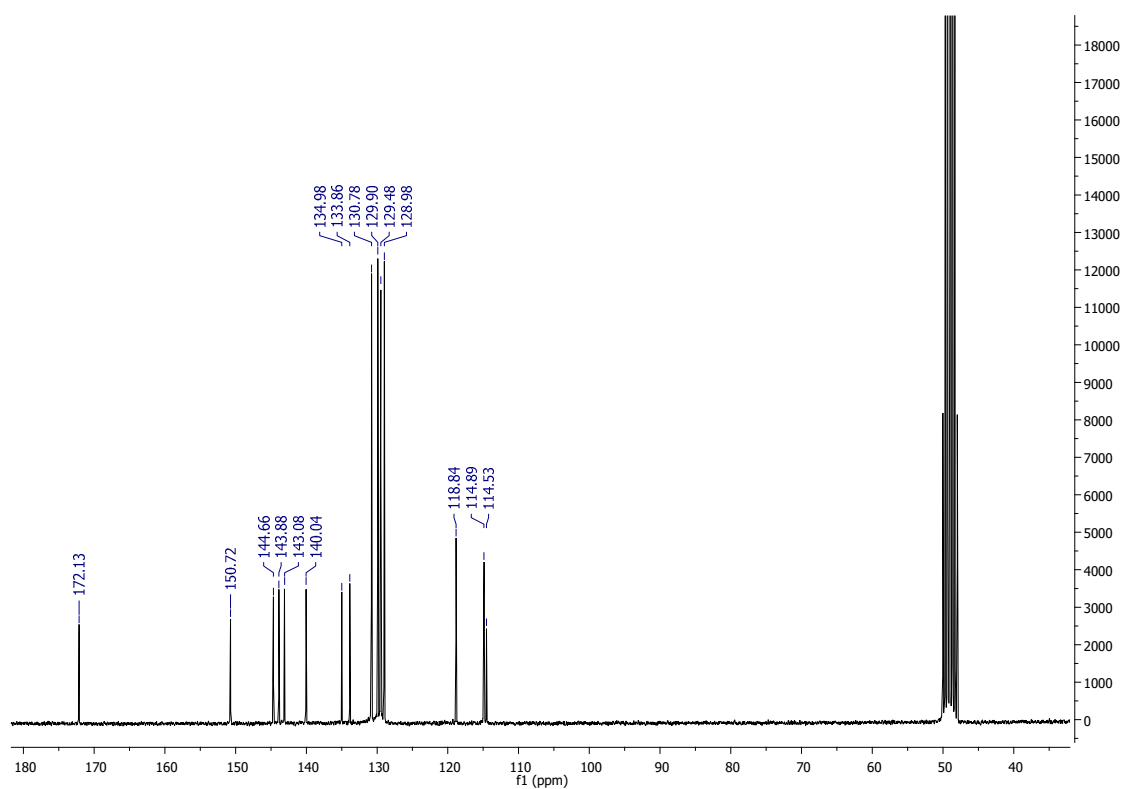



# 6-Amino-2-phenyl-4-(4-methoxyphenyl)benzoic acid (2e)

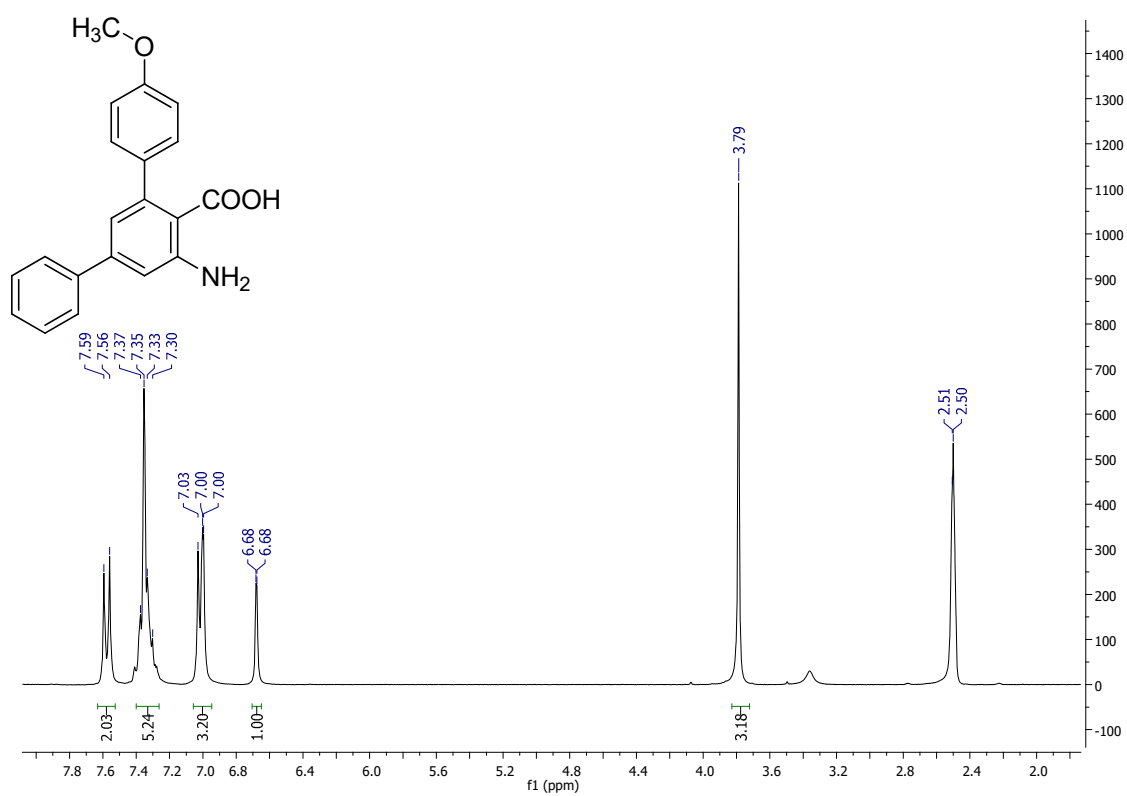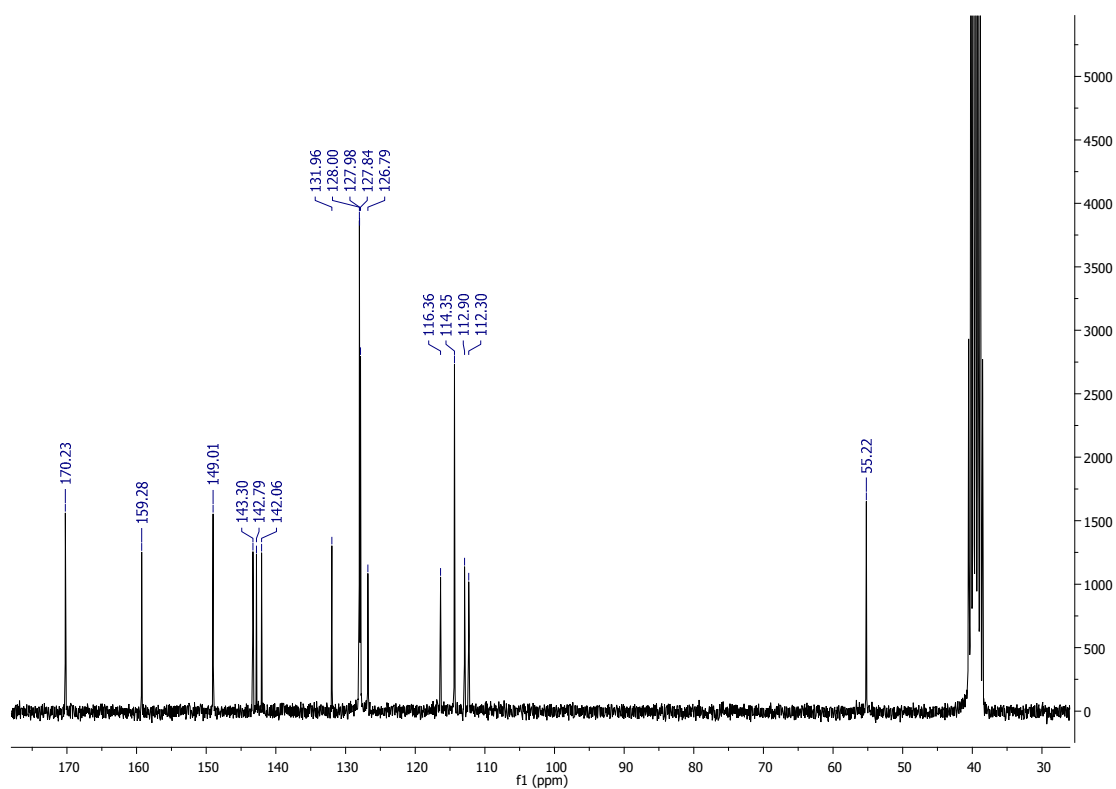



# **6-Amino-2,4-di-(4-bromophenyl) benzoic acid (2f)**

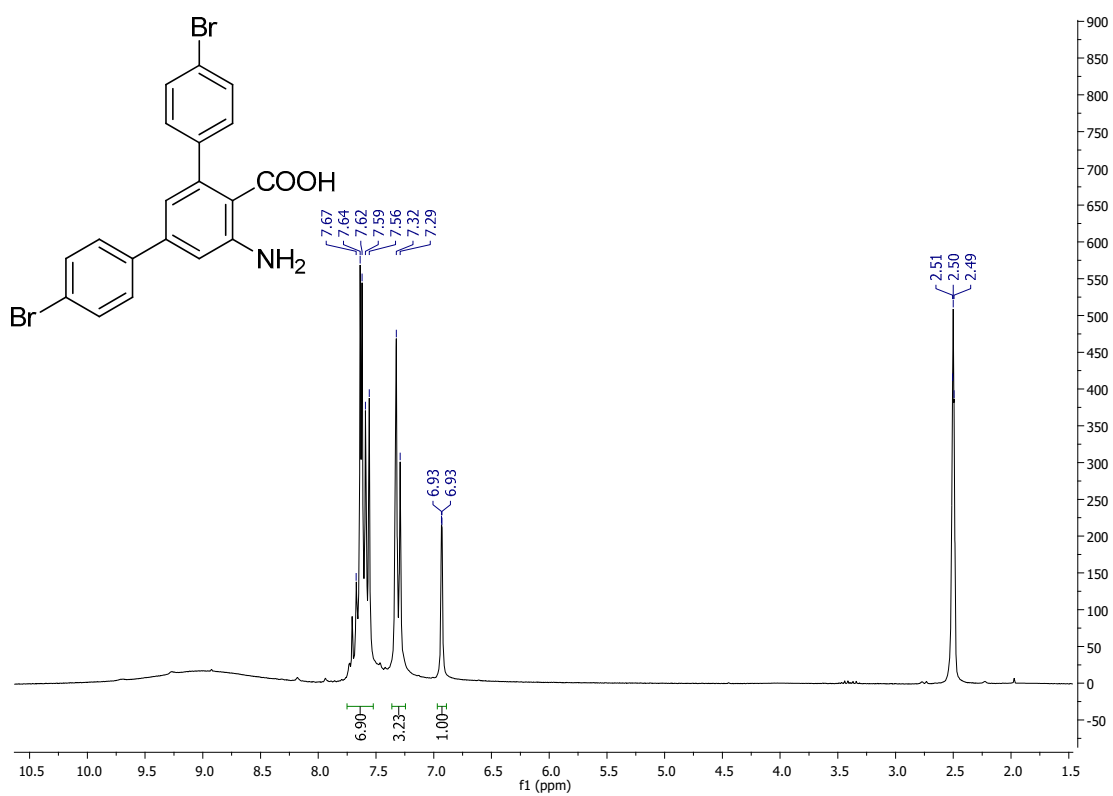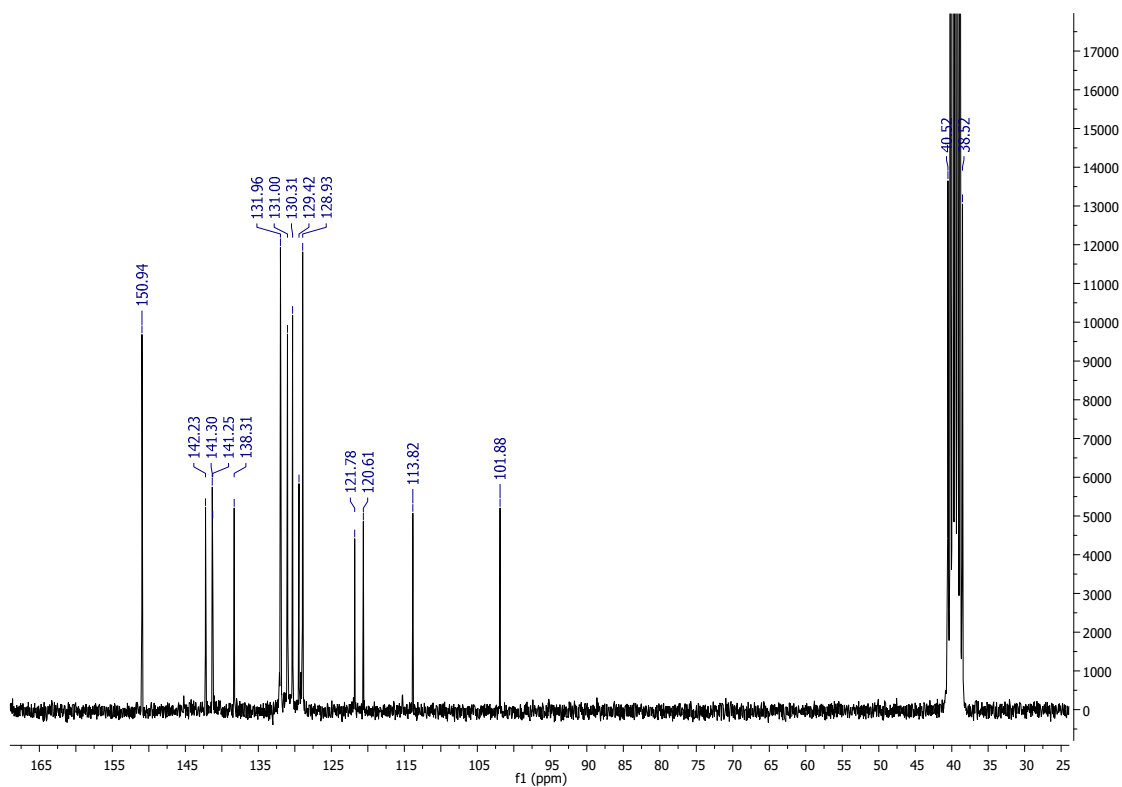



# 6-Phenylamino-2,4-diphenyl-benzoic acid (2g)

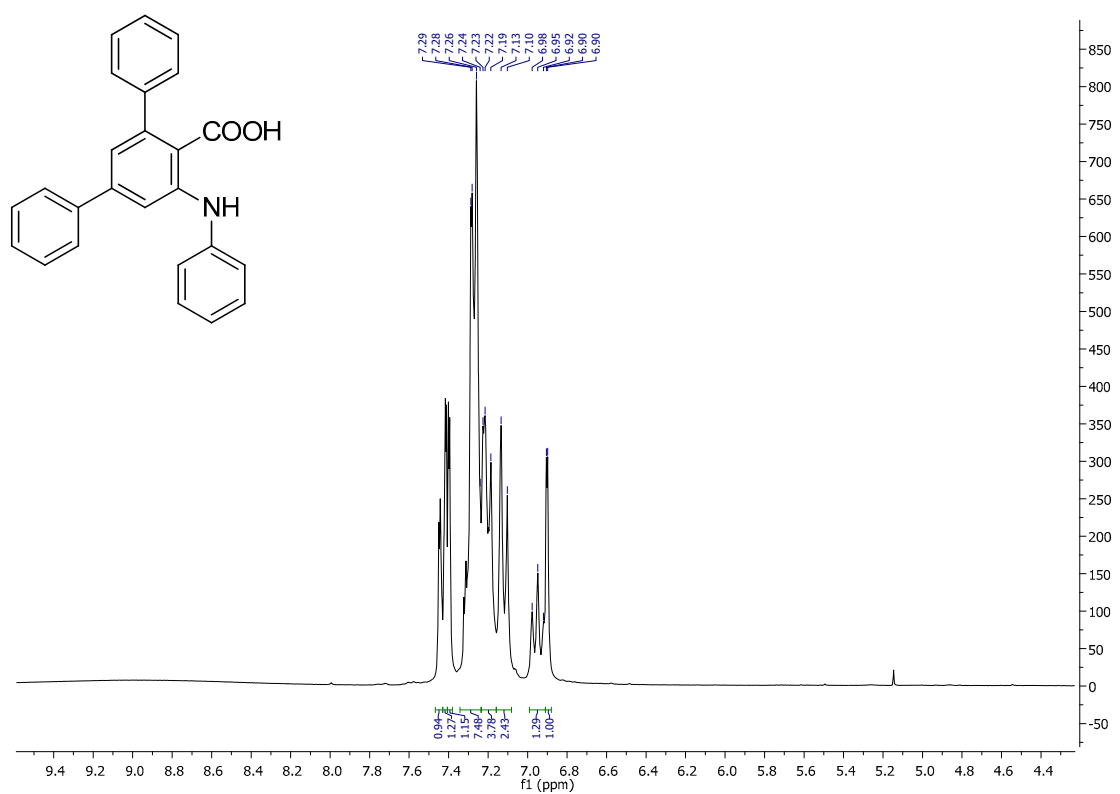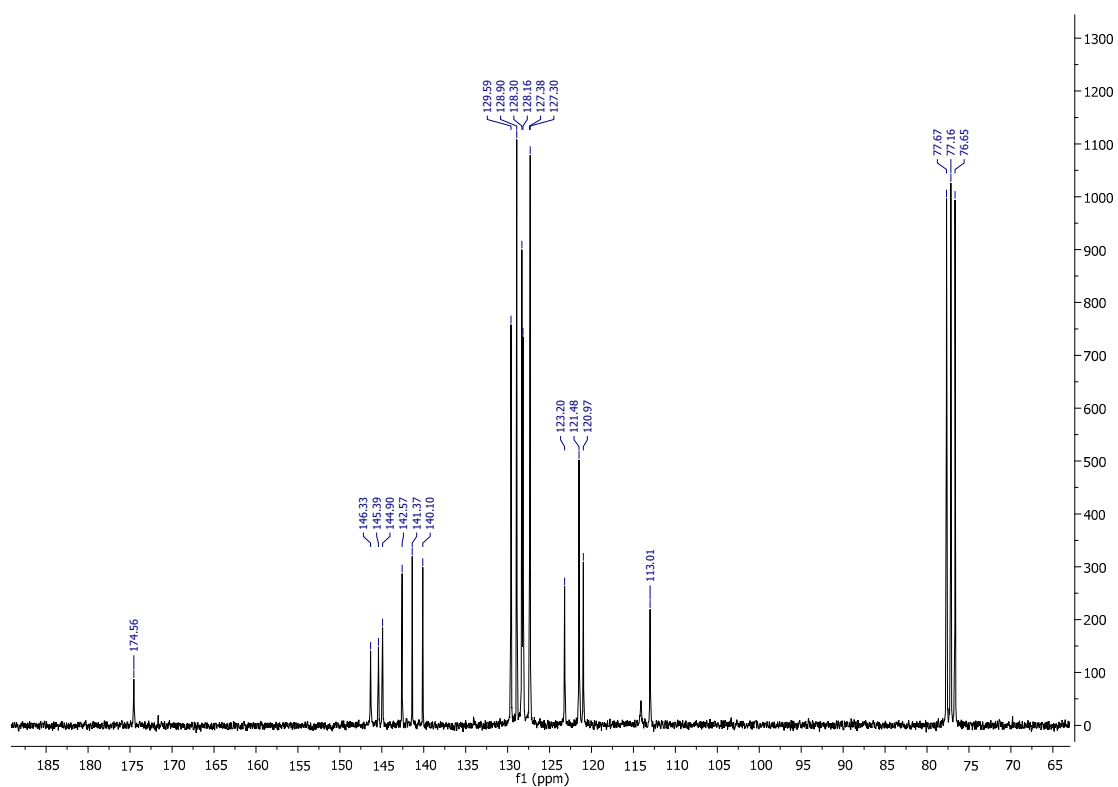



### 5'-Amino-*m*-terphenyl (3a)

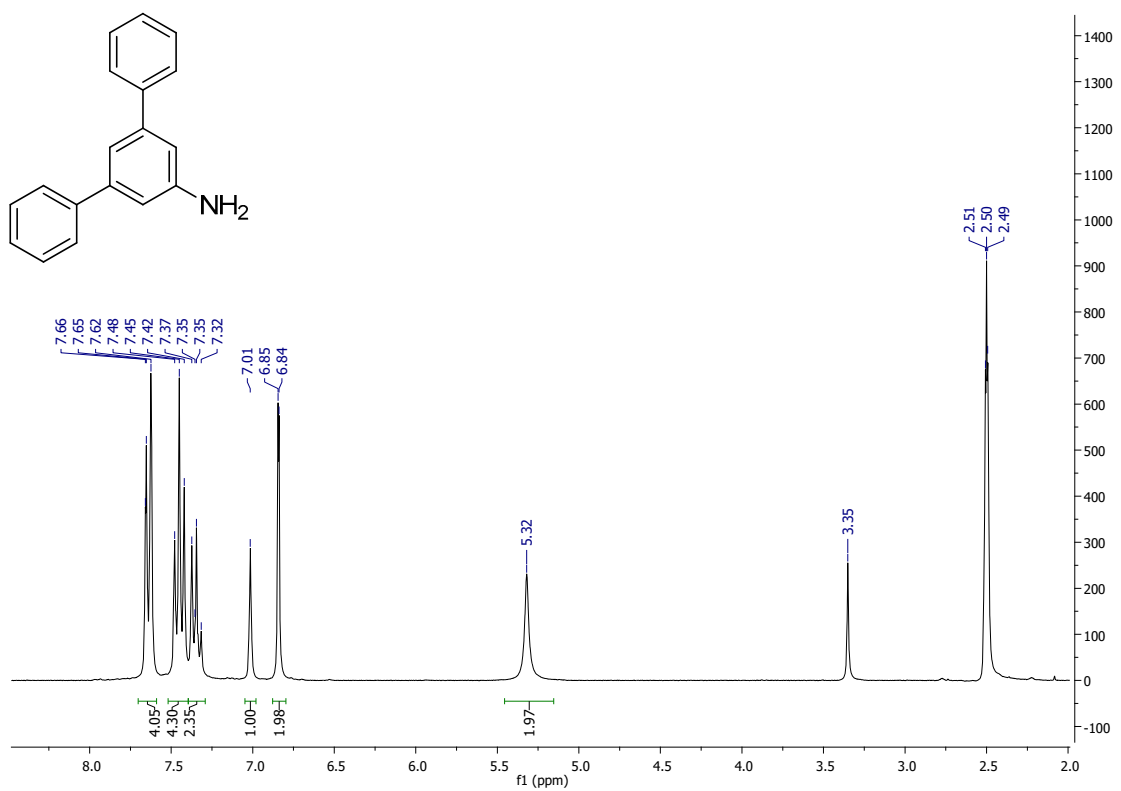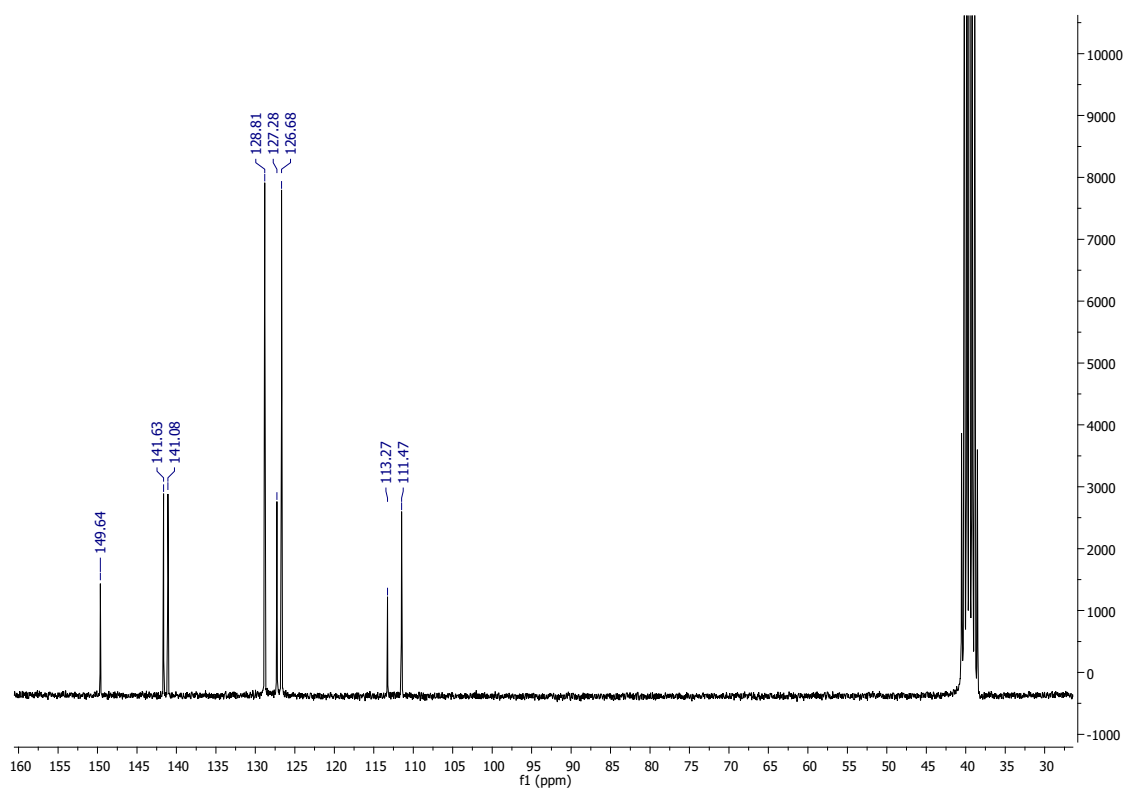



# 4-Methyl-5'-amino-*m*-terphenyl (3b)

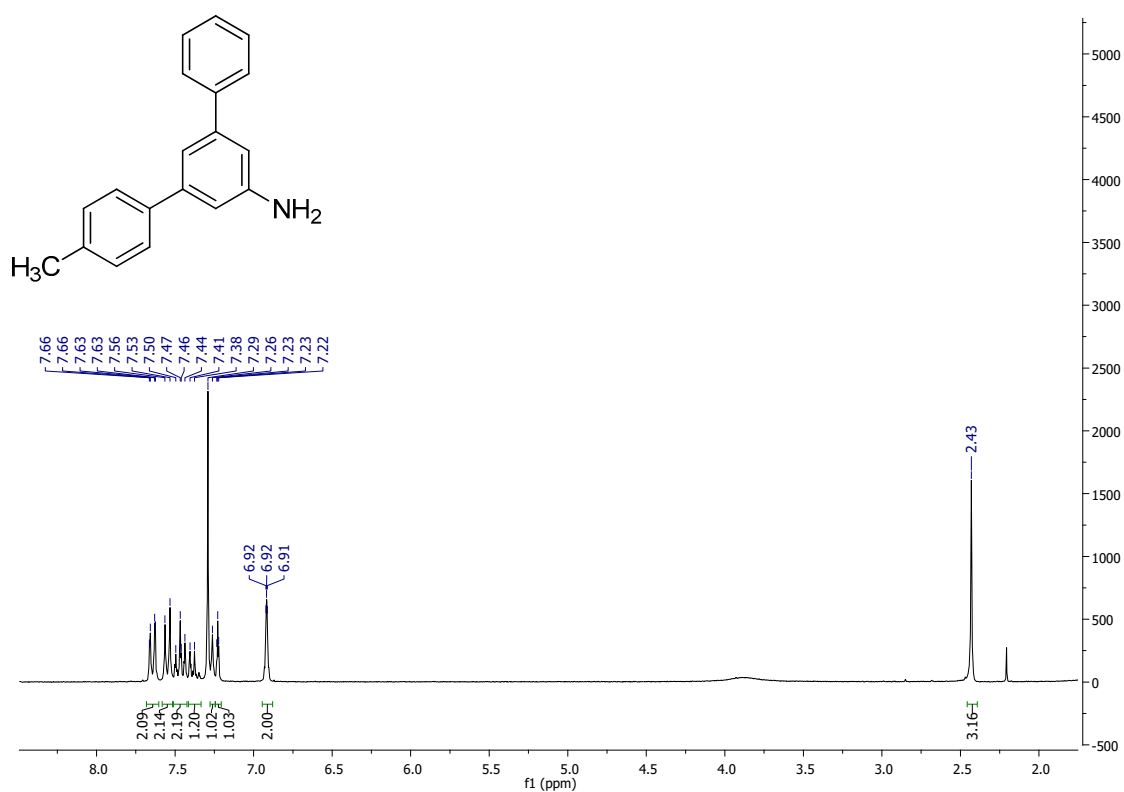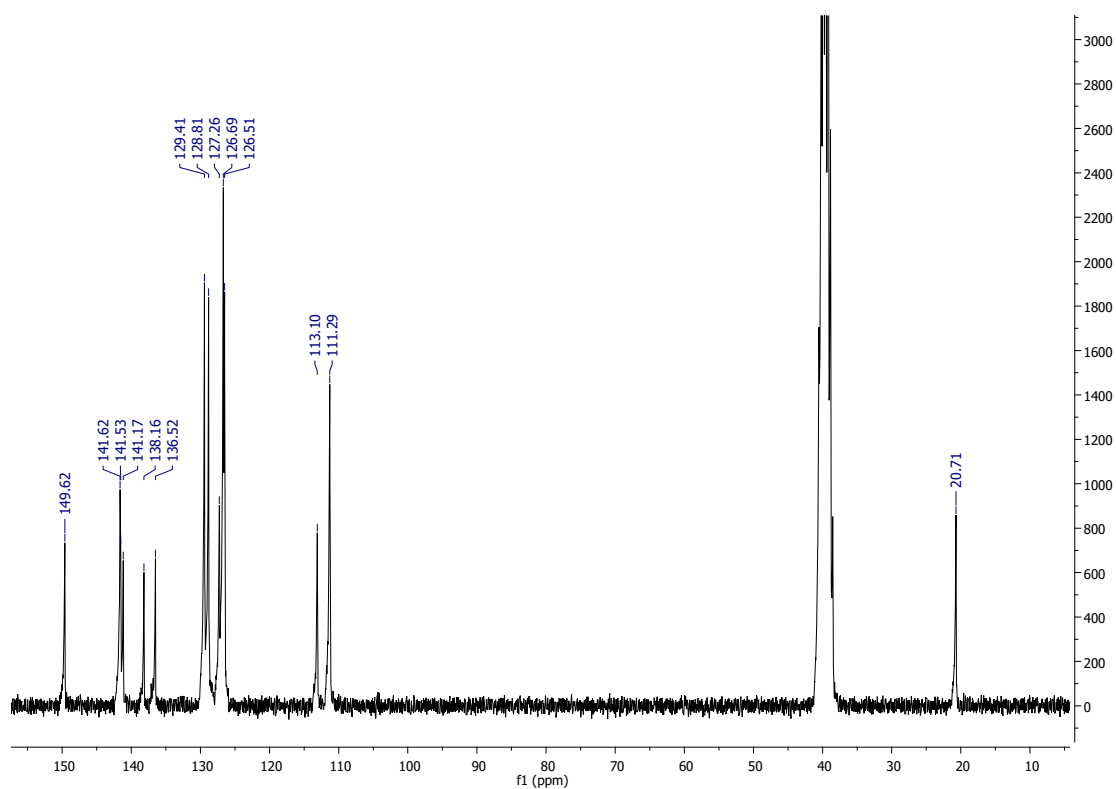



# 4-Chloro-5'-amino-*m*-terphenyl (3c)

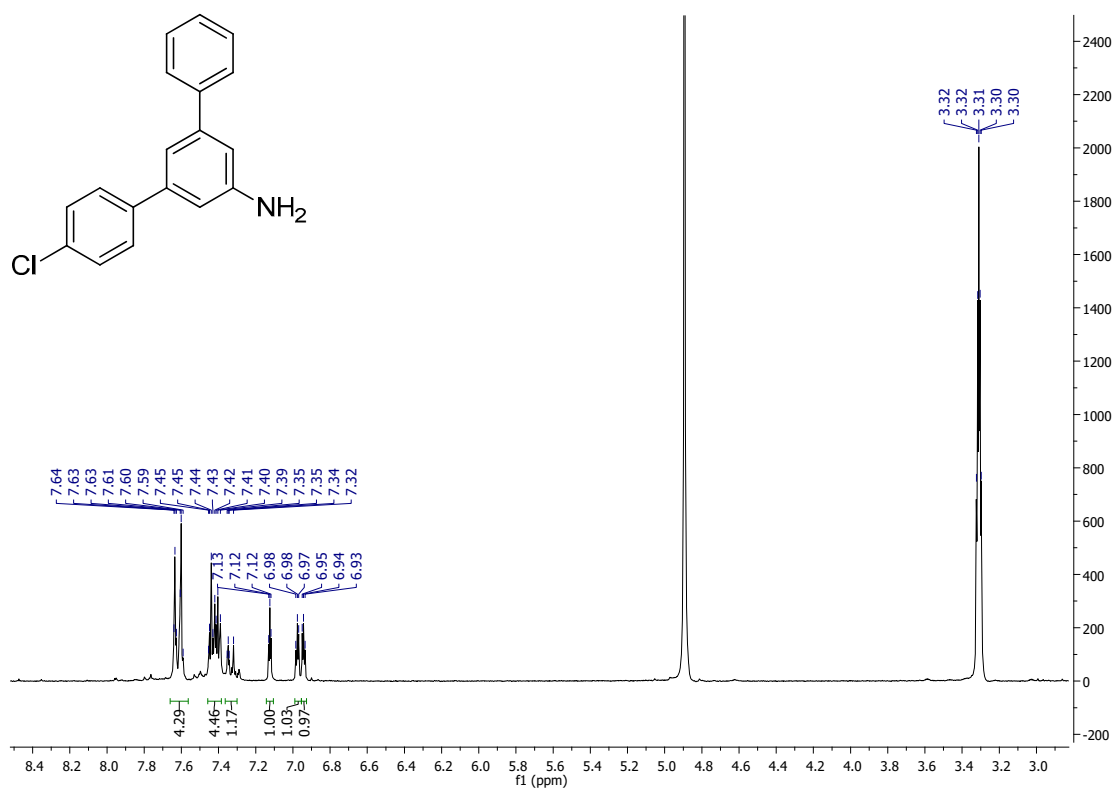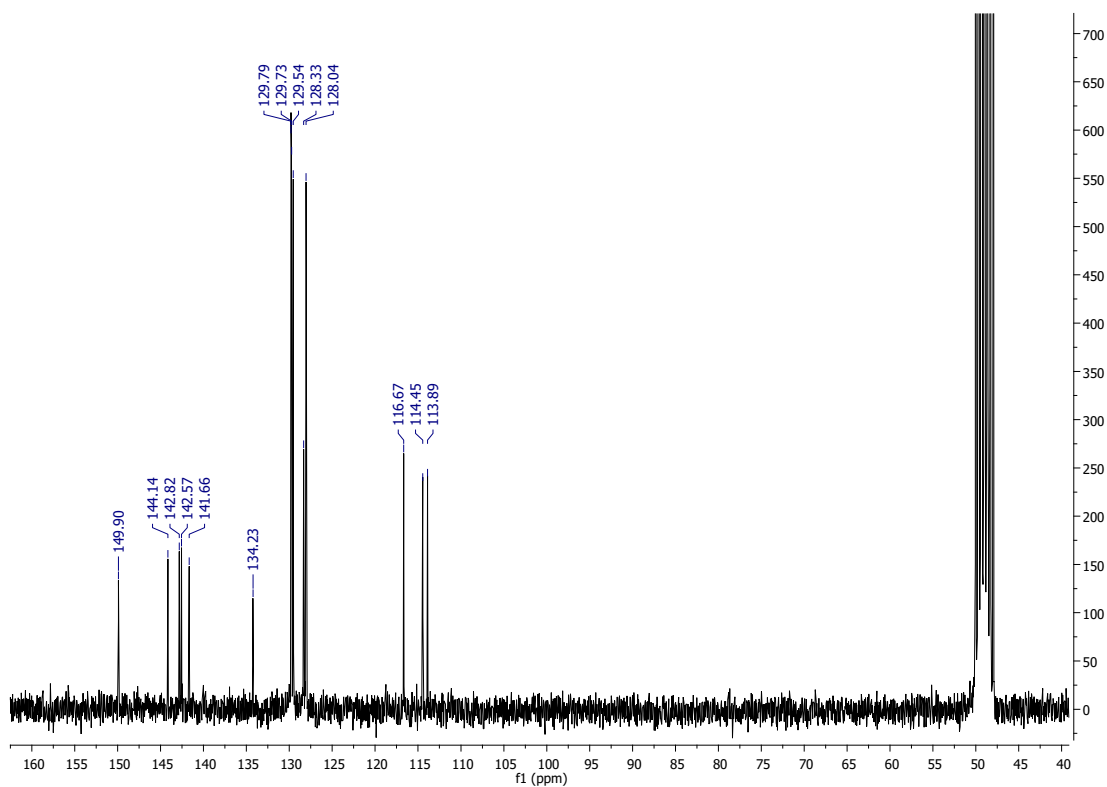



**4,4''-Dichloro-5'-amino-*m*-terphenyl (3d)**

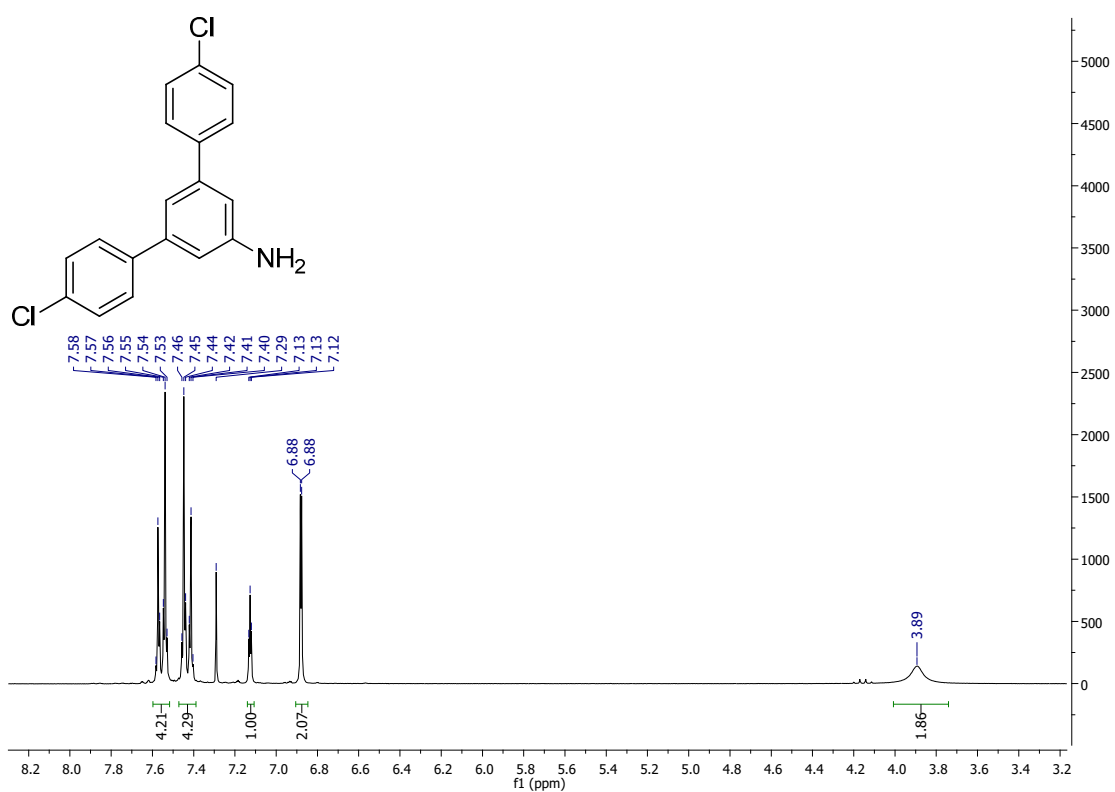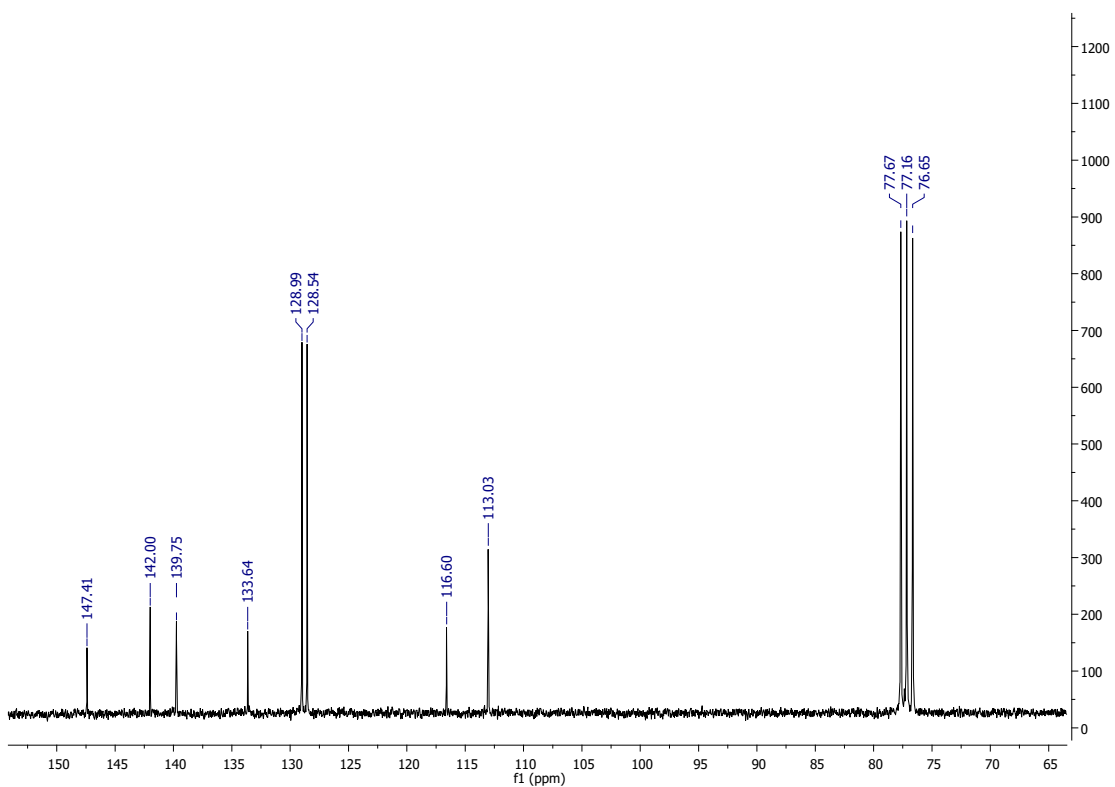



### 4-Methoxy-5'-amino-*m*-terphenyl (3e)

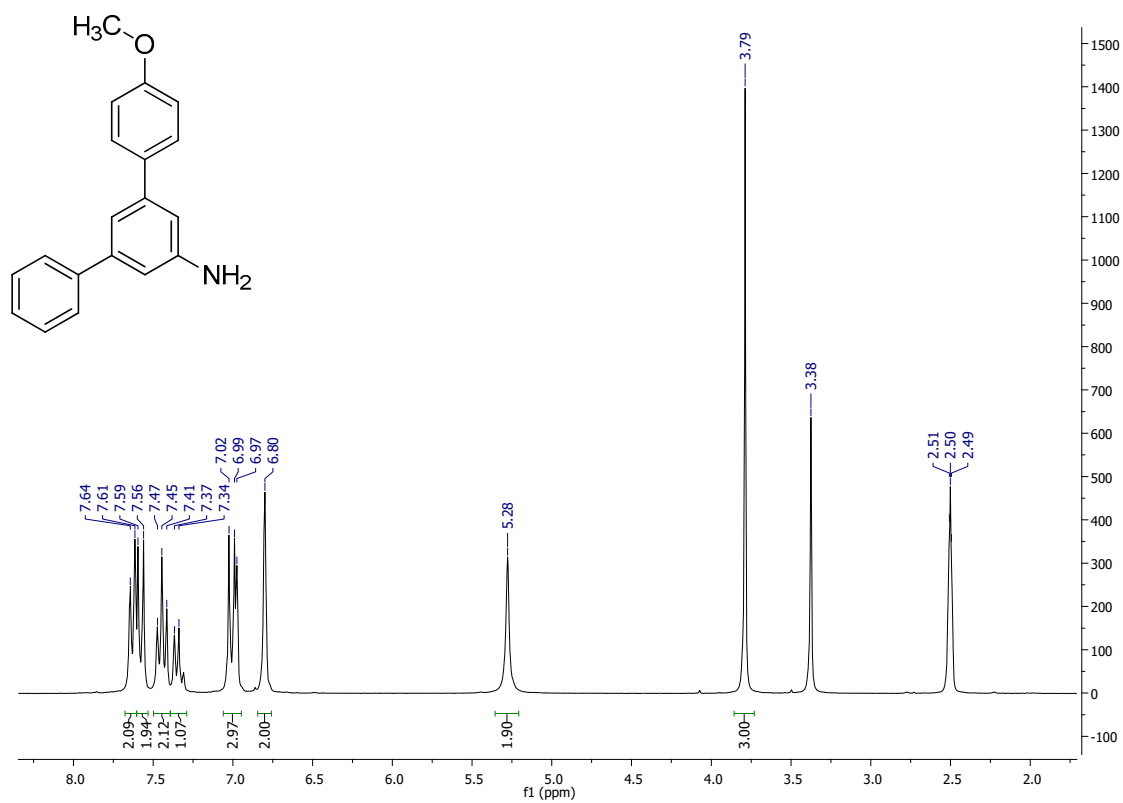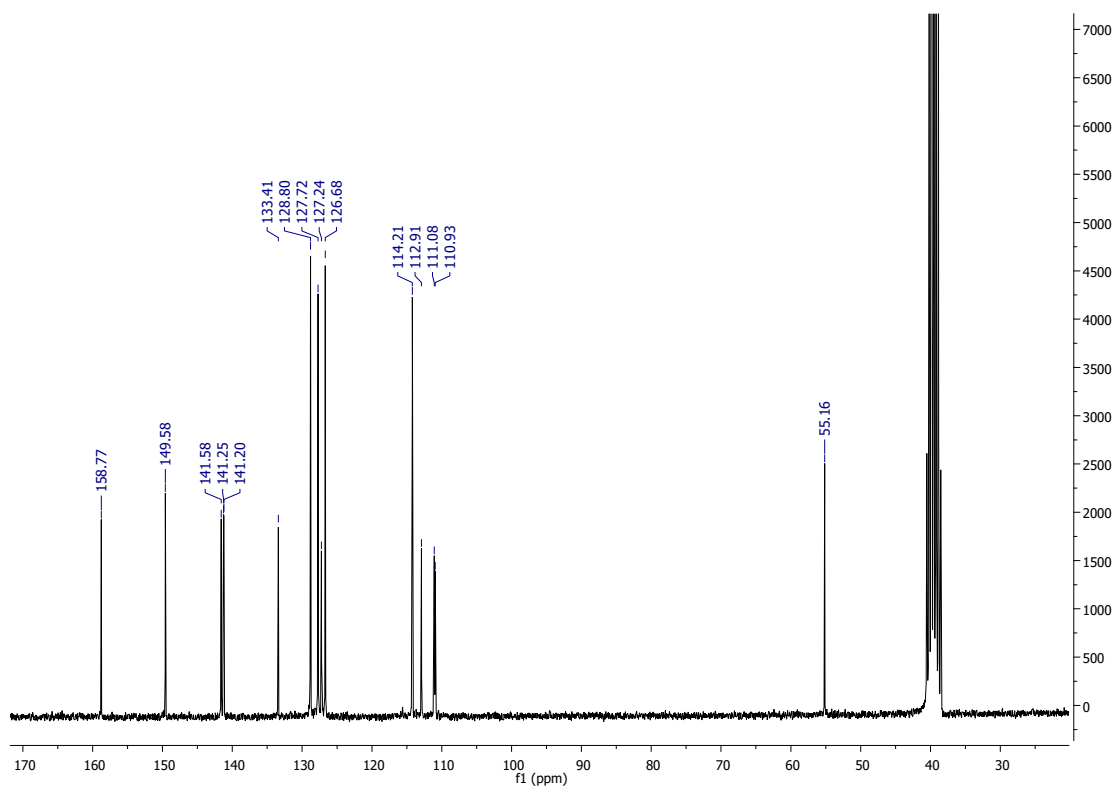



**4,4''-Dibromo-5'-amino-*m*-terphenyl (3f)**

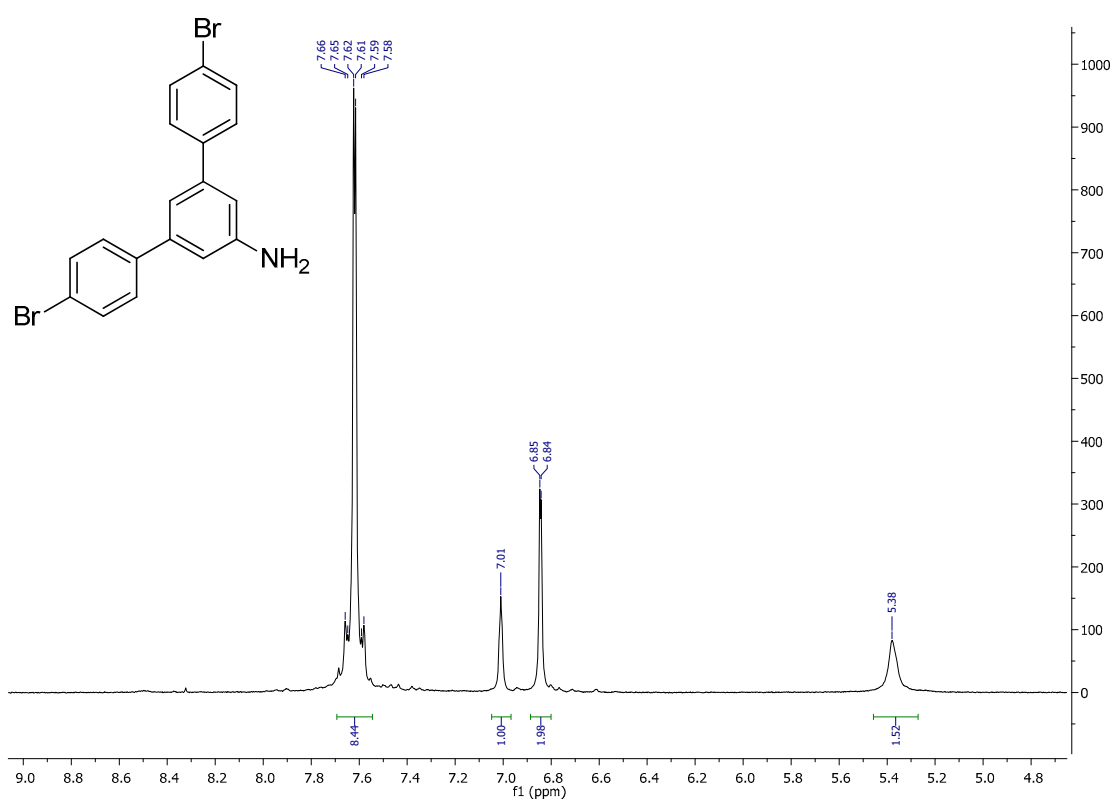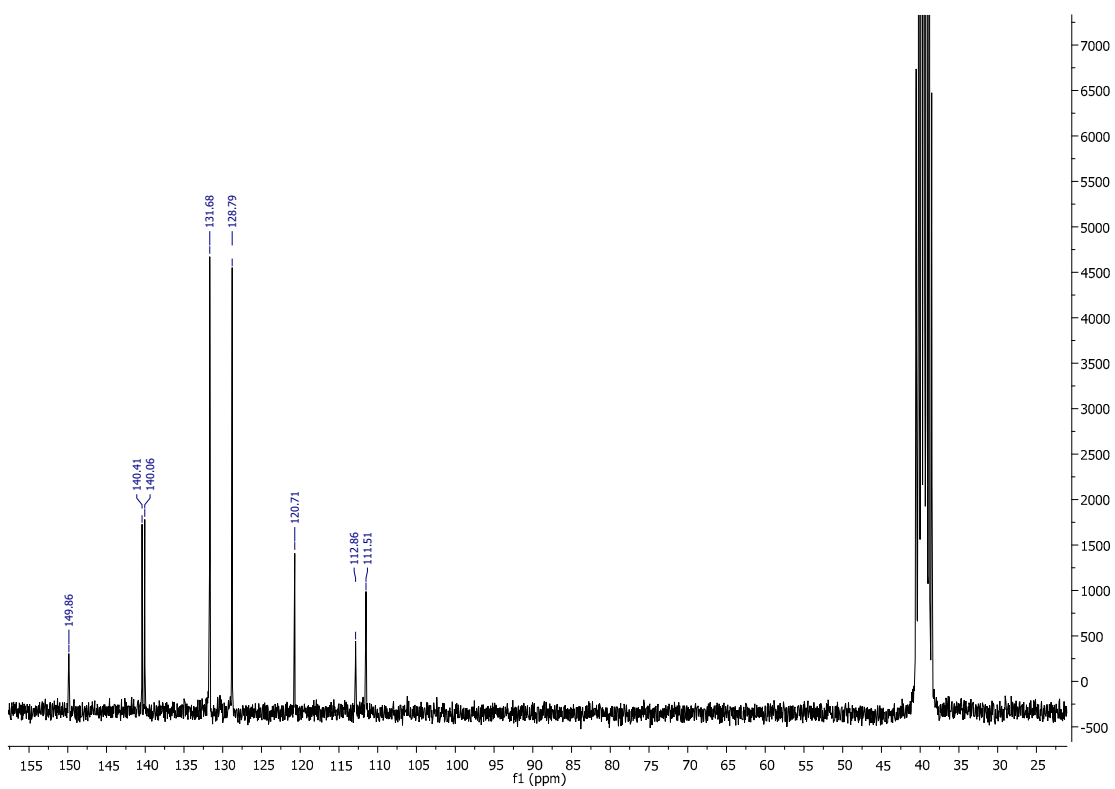



# **5'-Phenylamino-*m*-terphenyl (3g)**

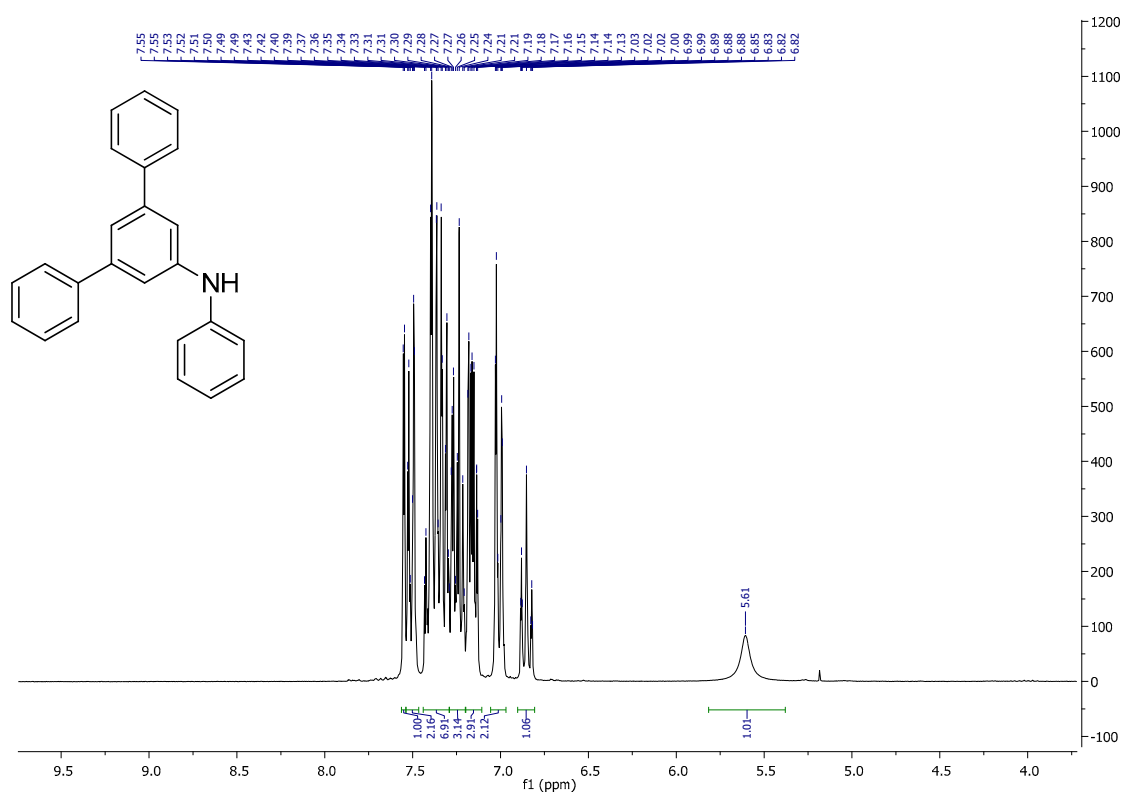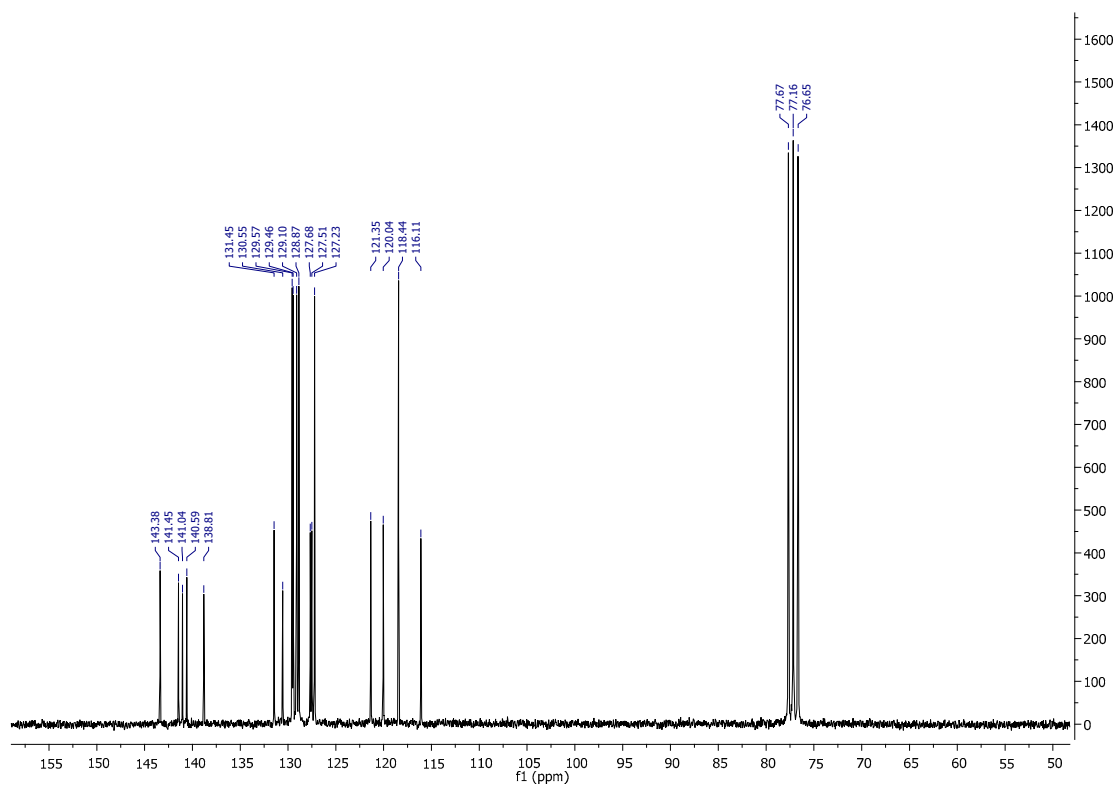



**1-([*m*-Terphenyl]-5'-yl)-3-cyclopentylurea (4a)**

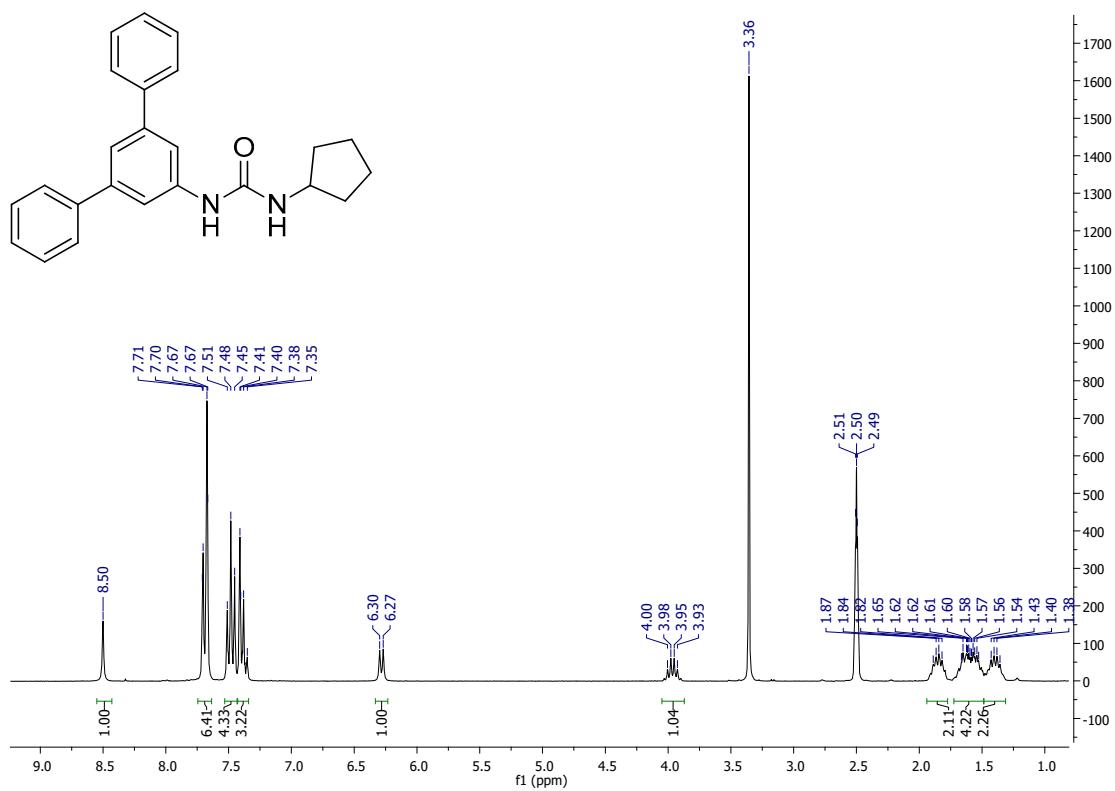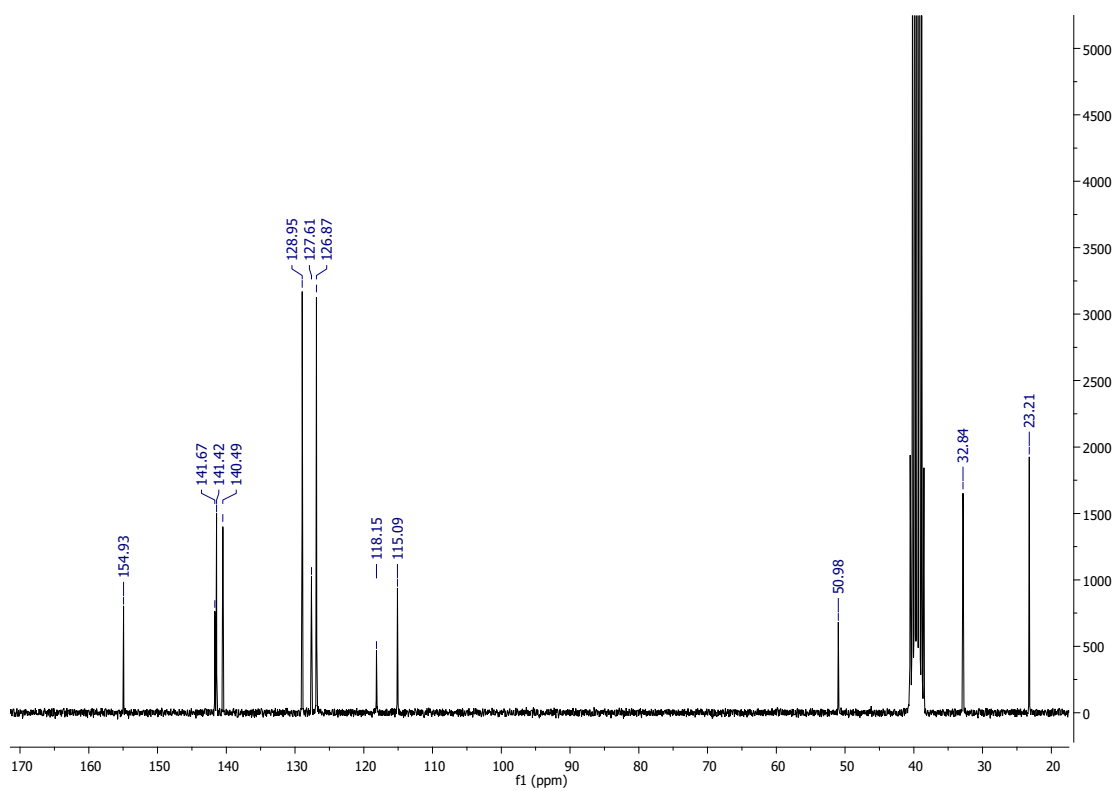



# 1-([4-Methyl-*m*-terphenyl]-5'-yl)-3-cyclopentylurea (4b)

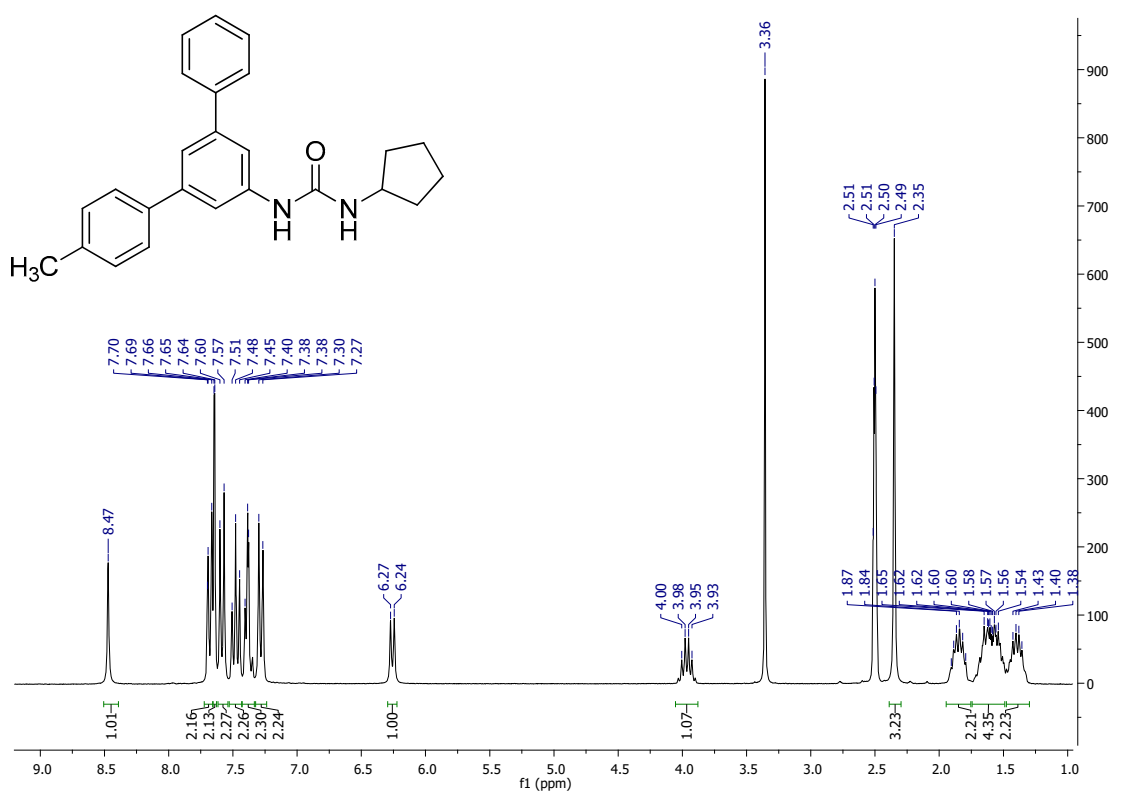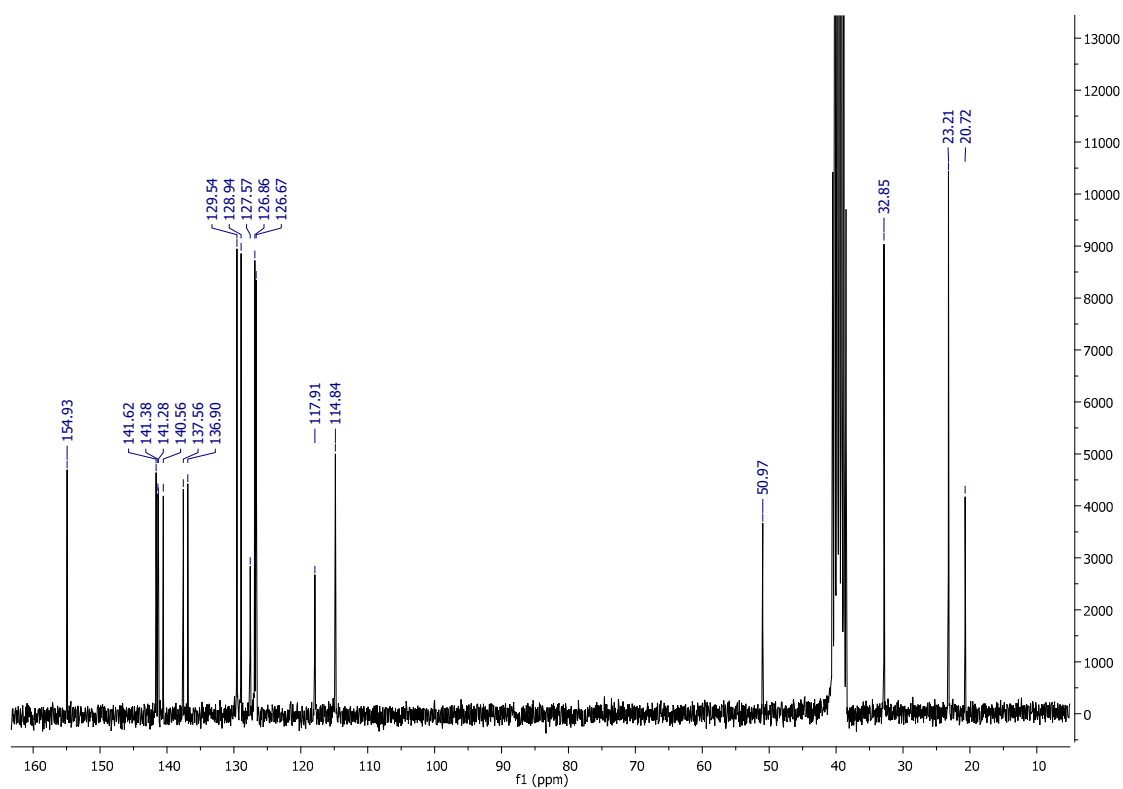



1-([4-Chloro-*m*-terphenyl]-5'-yl)-3-cyclopentylurea (4c)

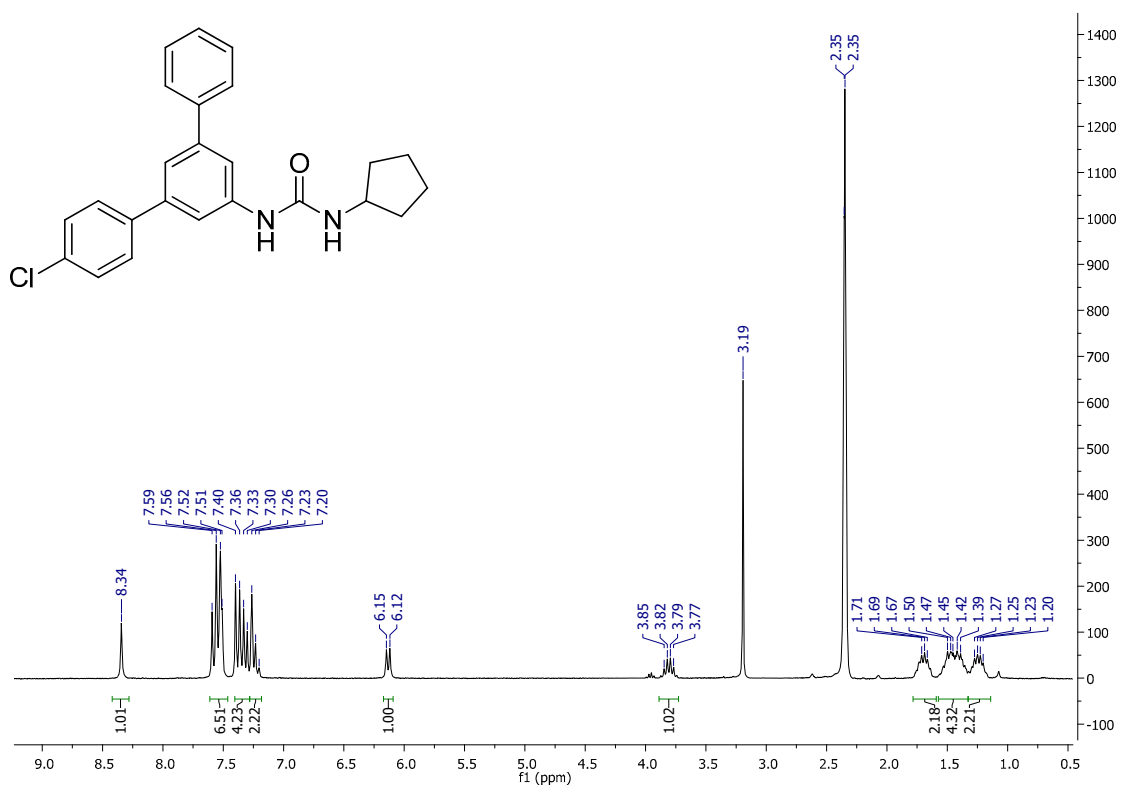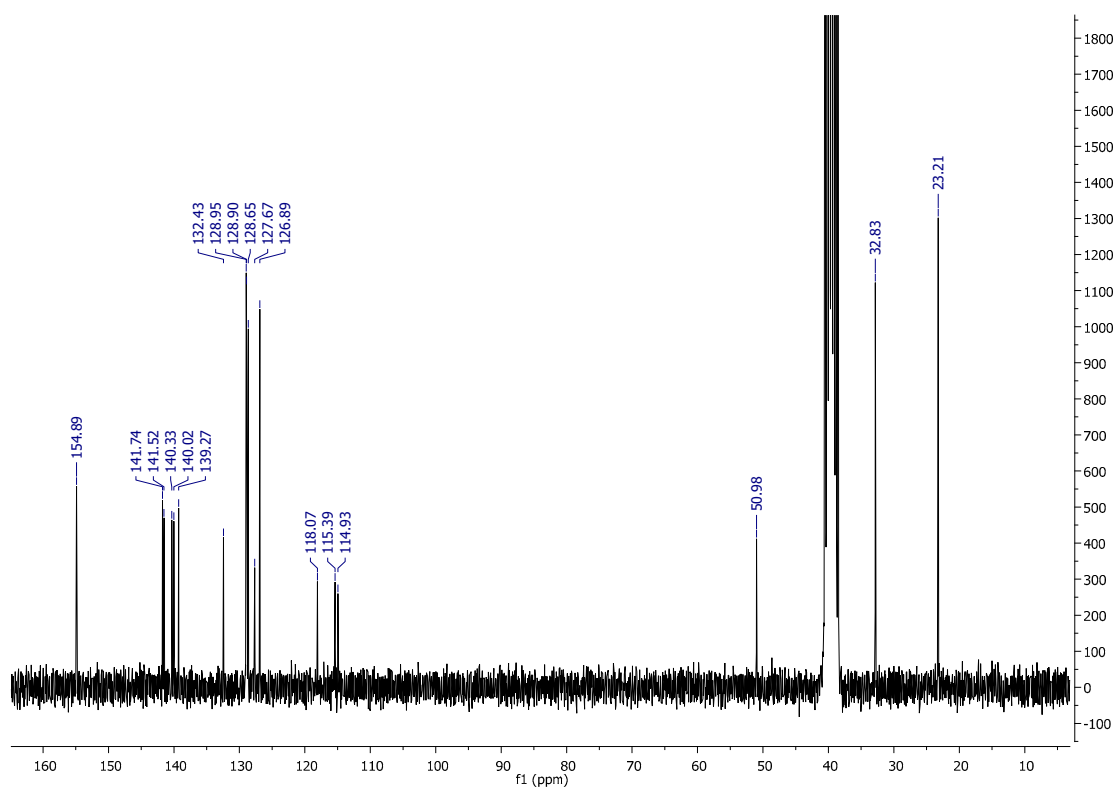



**1-([4,4''-Dichloro-*m*-terphenyl]-5'-yl)-3-cyclopentylurea (4d)**

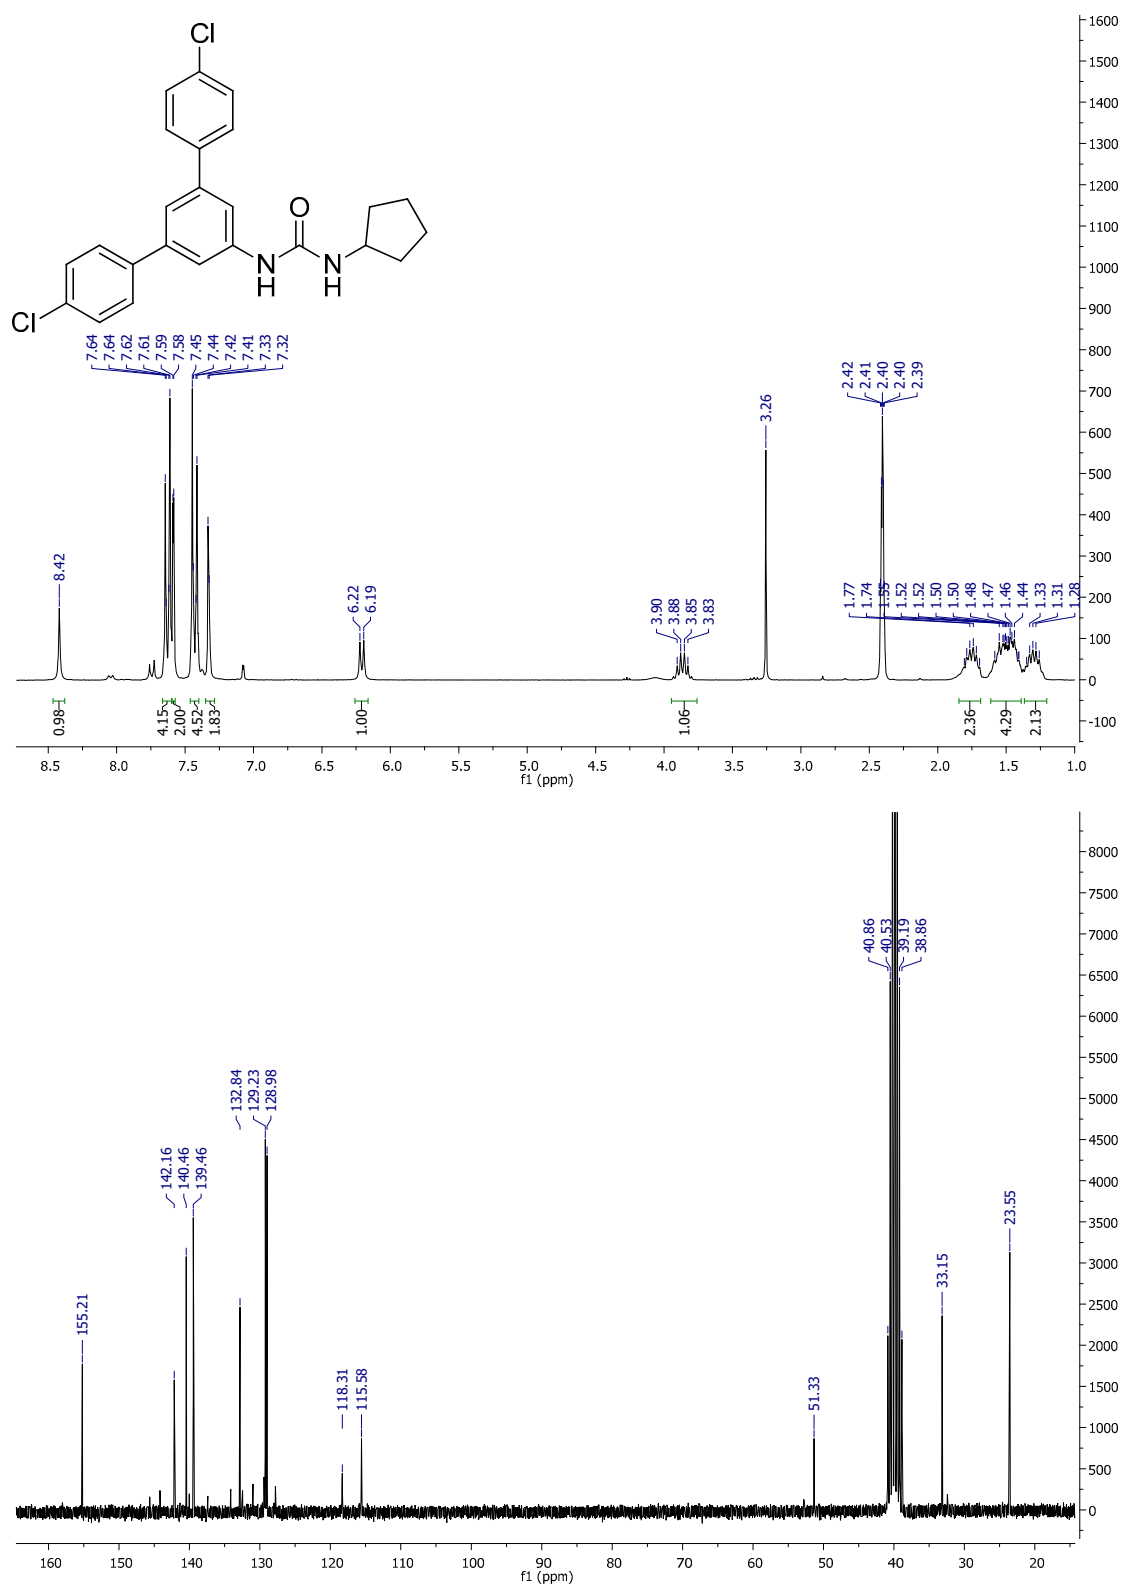



# 1-([4-Methoxy-*m*-terphenyl]-5'-yl)-3-cyclopentylurea (4e)

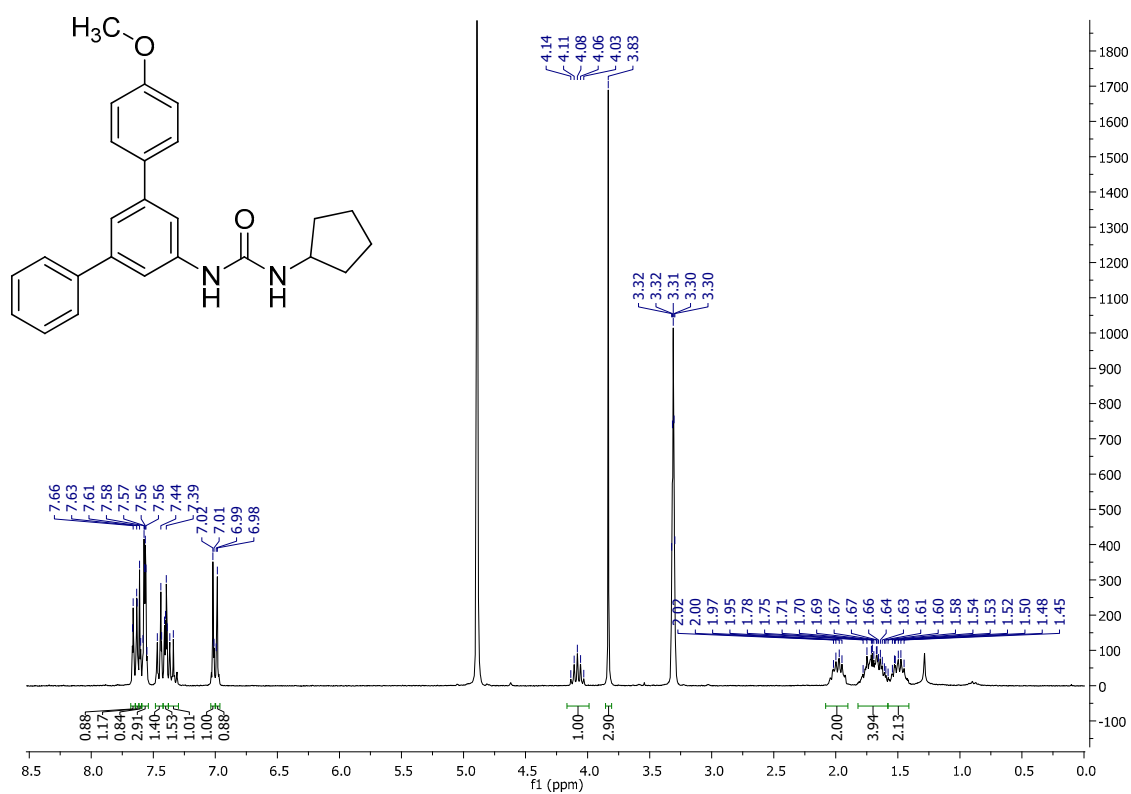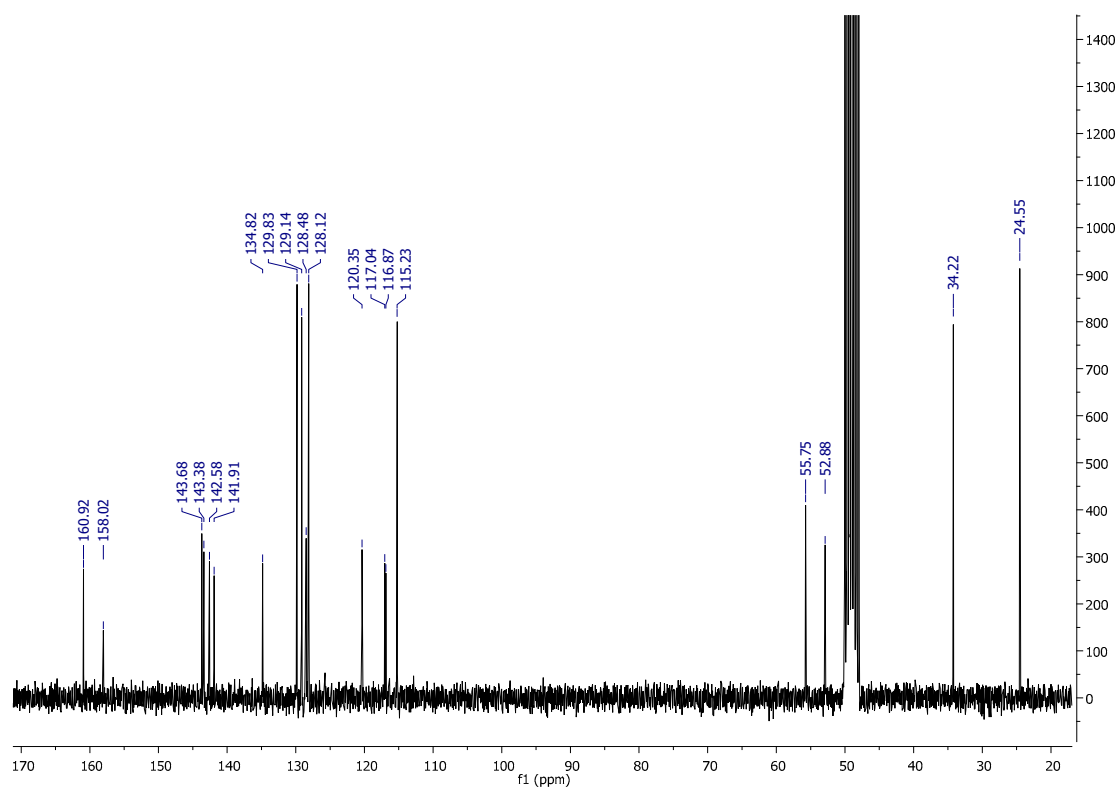



**1-([4,4''-Dibromo-*m*-terphenyl]-5'-yl)-3-cyclopentylurea (4f)**

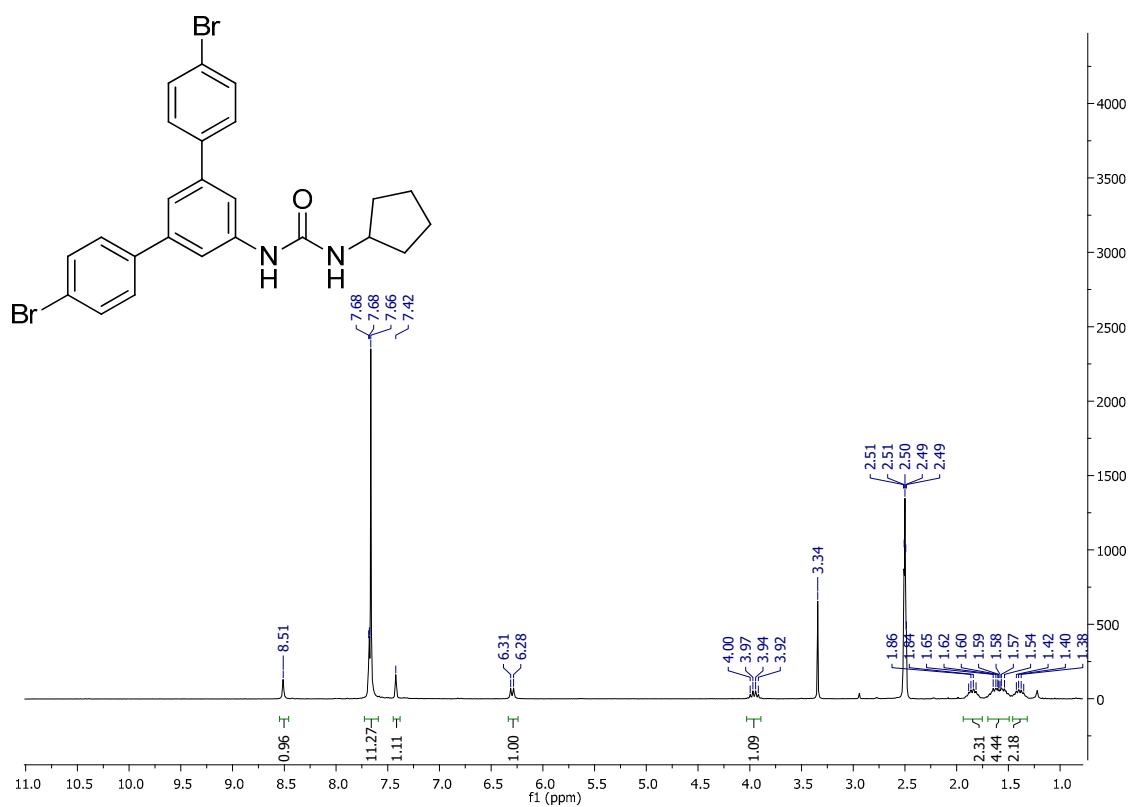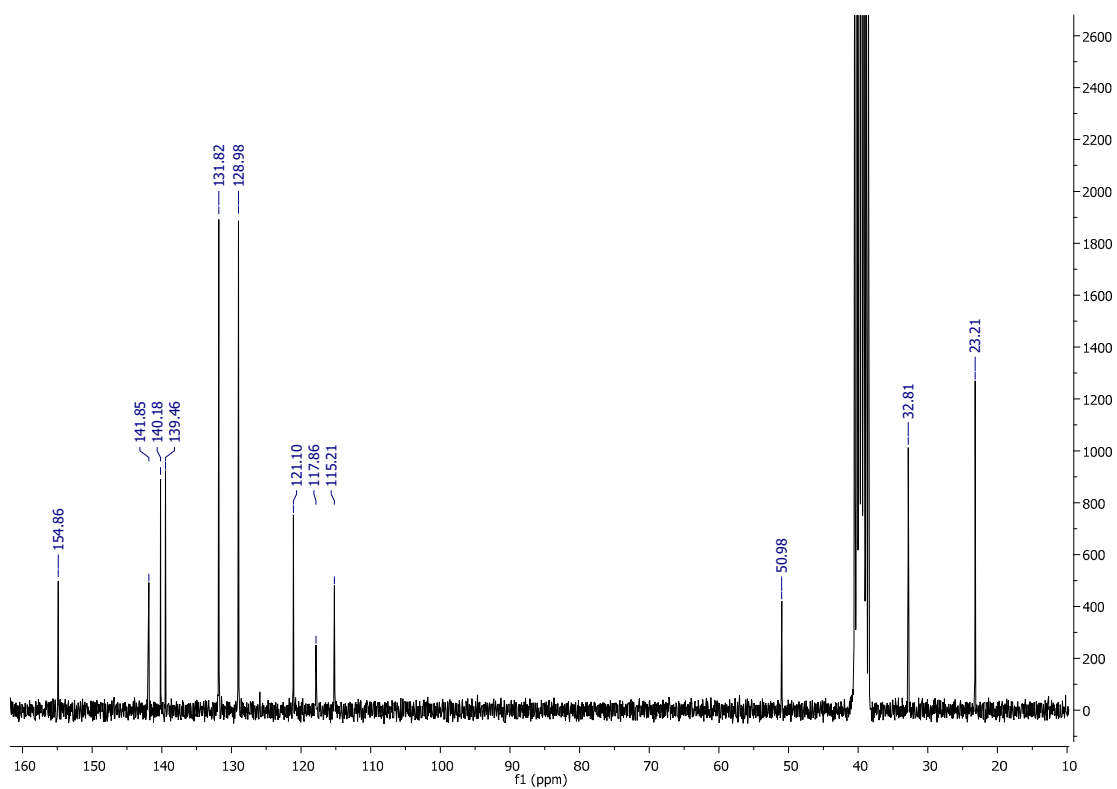



# **Ethyl 5'-(3-cyclohexylureido)-4-methoxy-*m*-terphenyl-4'-carboxylate (5)**

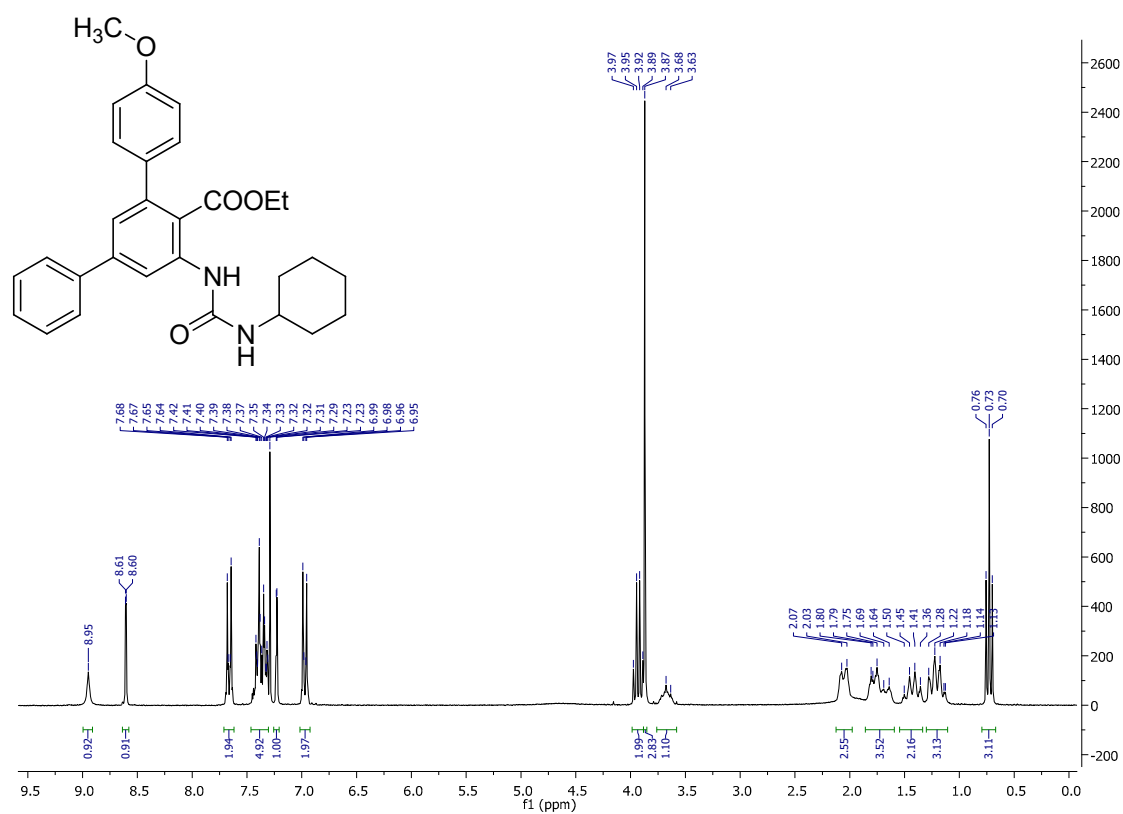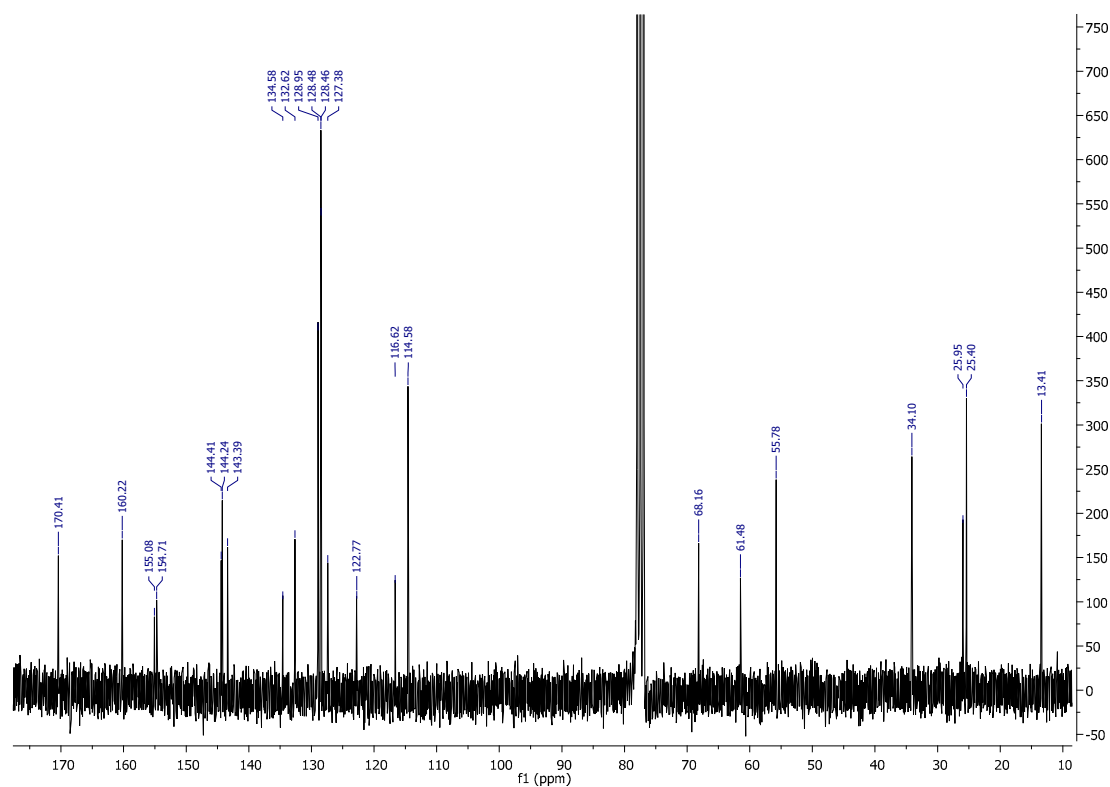

Supplement: s1 [file s1]
